# Supplementary material for: Health information exchange technology on the front lines of healthcare: workflow factors and patterns of use
Source: PubMed Central journal article supplement — J Am Med Inform Assoc. 2011 Oct 14;19(3):392–400. doi: 10.1136/amiajnl-2011-000432 (PMC3341790; doi:10.1136/amiajnl-2011-000432), 2011-10-14
Supplement: amiajnl-2011-000432-s3.pdf [file amiajnl-2011-000432-s3.pdf]

# Hospital 1 HIE-Related Workflow

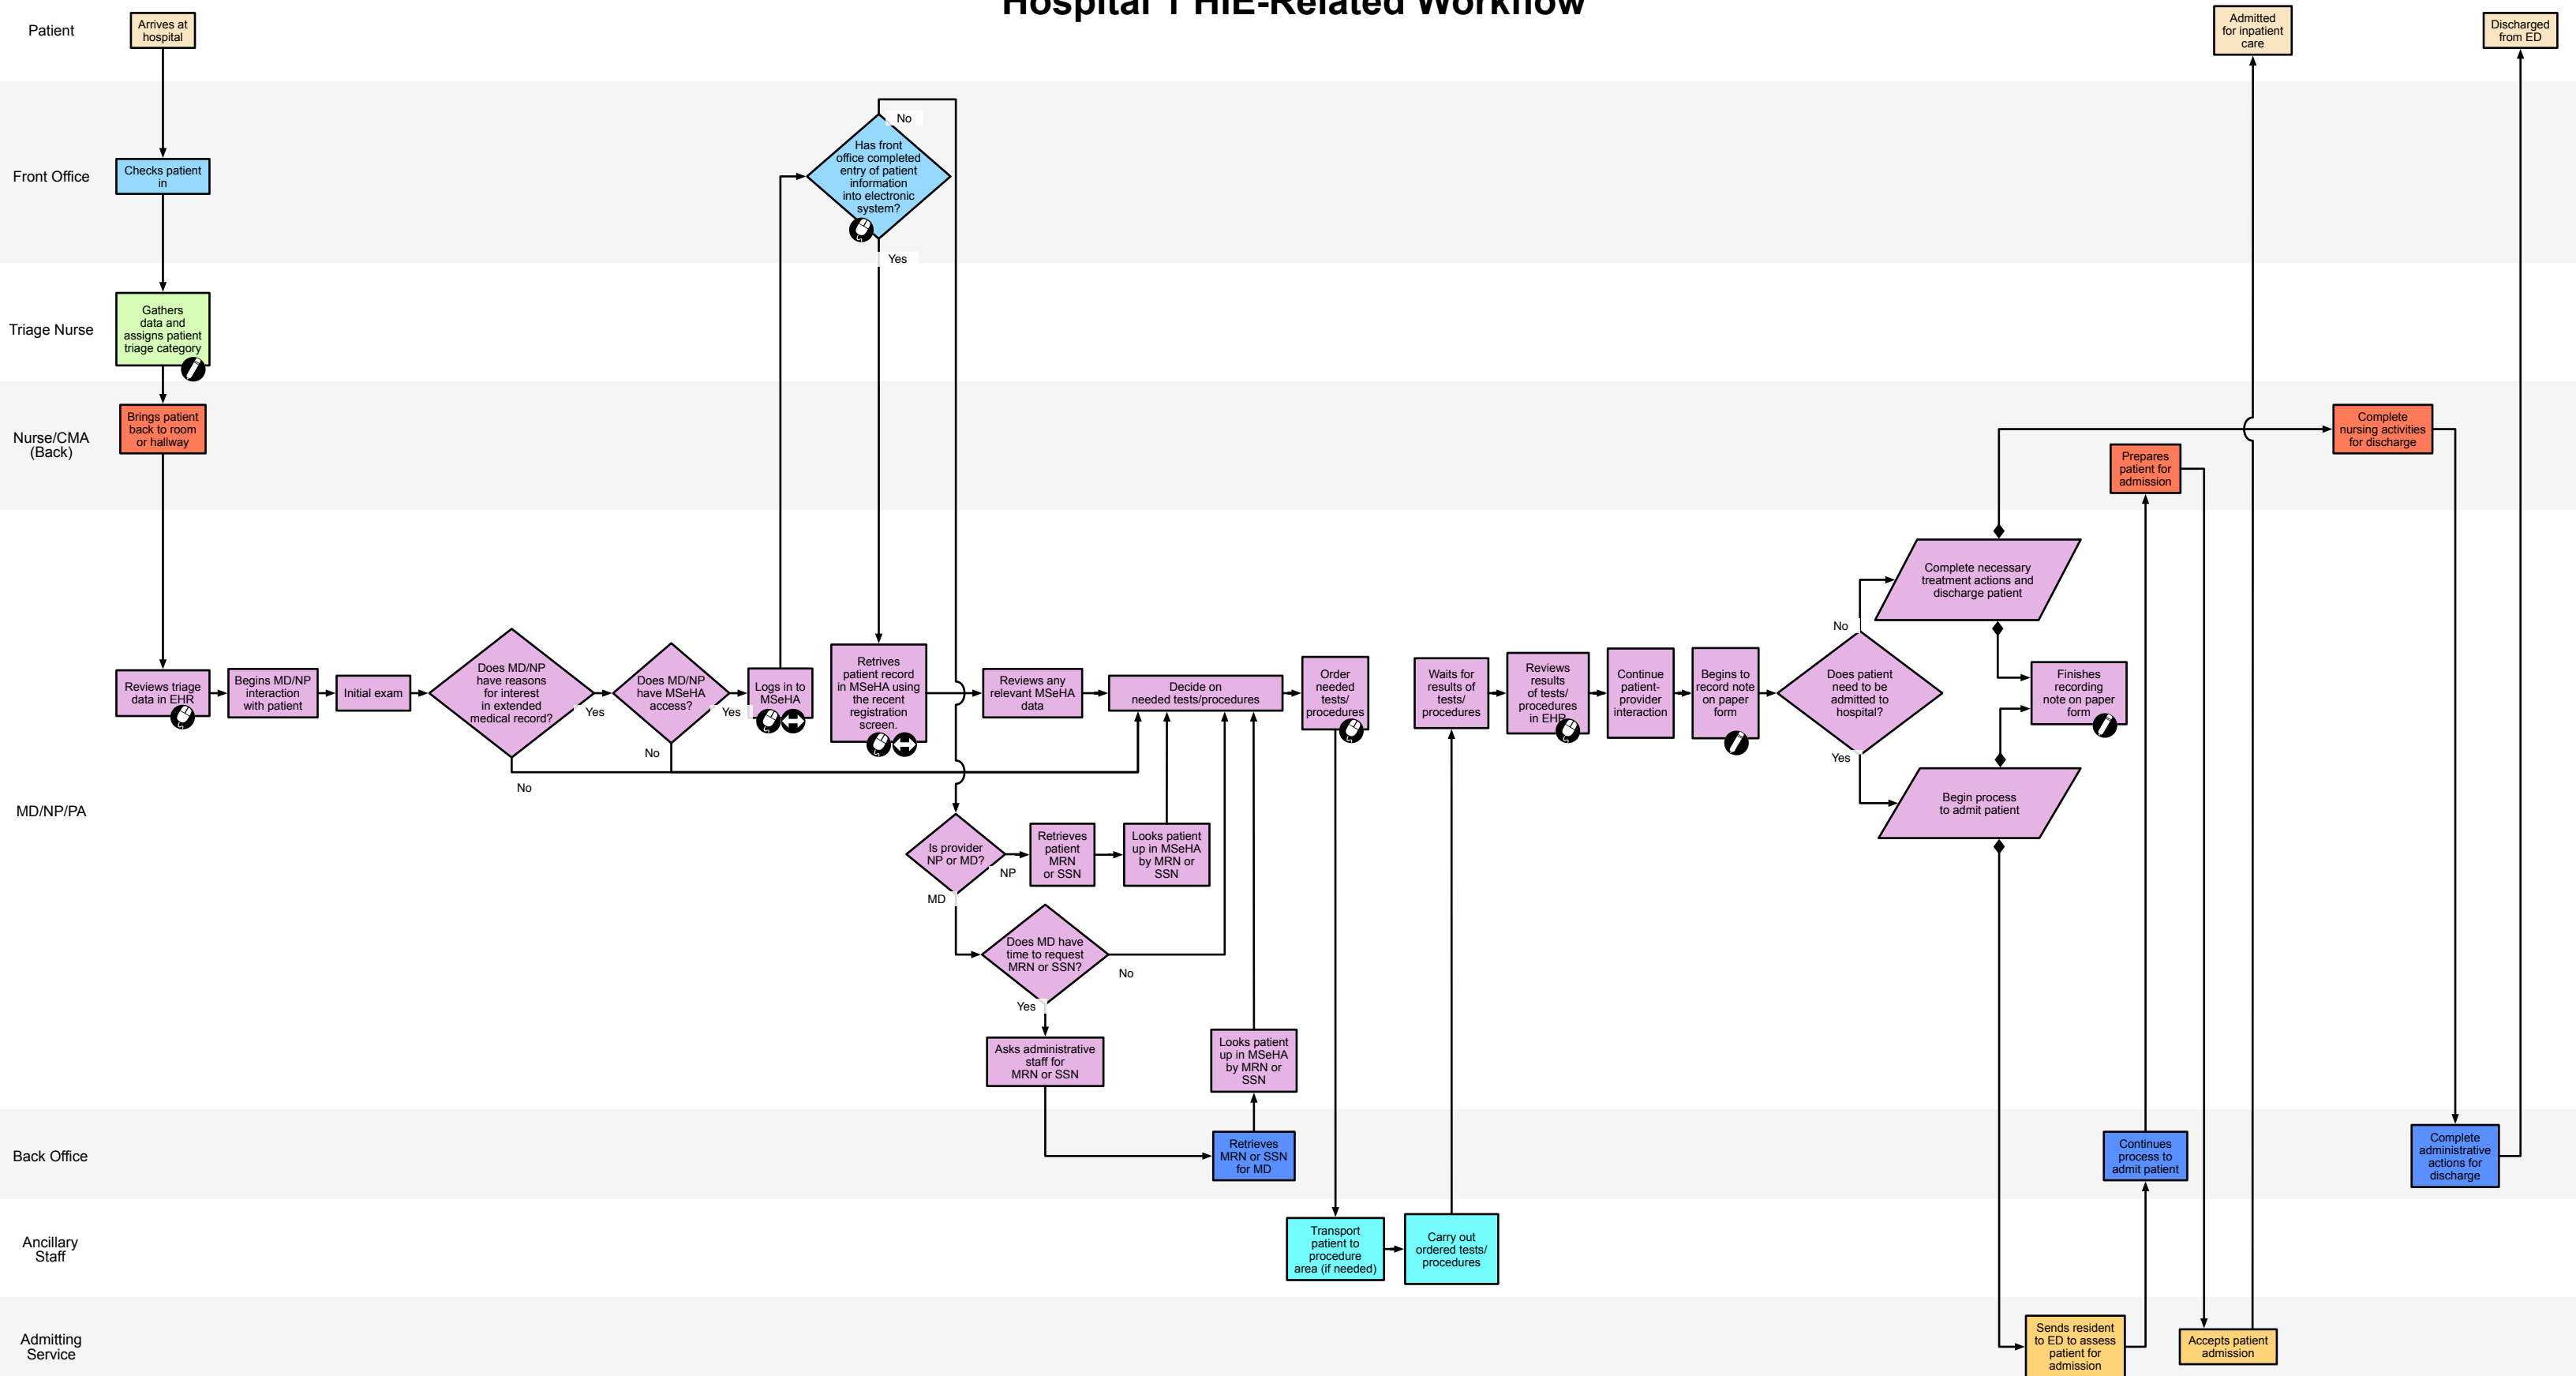

Time →

**Legend:**

- Paper or Manual Process
- Computerized or Electronic Process
- Data Exchange Process
- Action
- Decision
- Action, Multiple Simultaneous Outcomes

# Hospital 2 HIE-Related Workflow

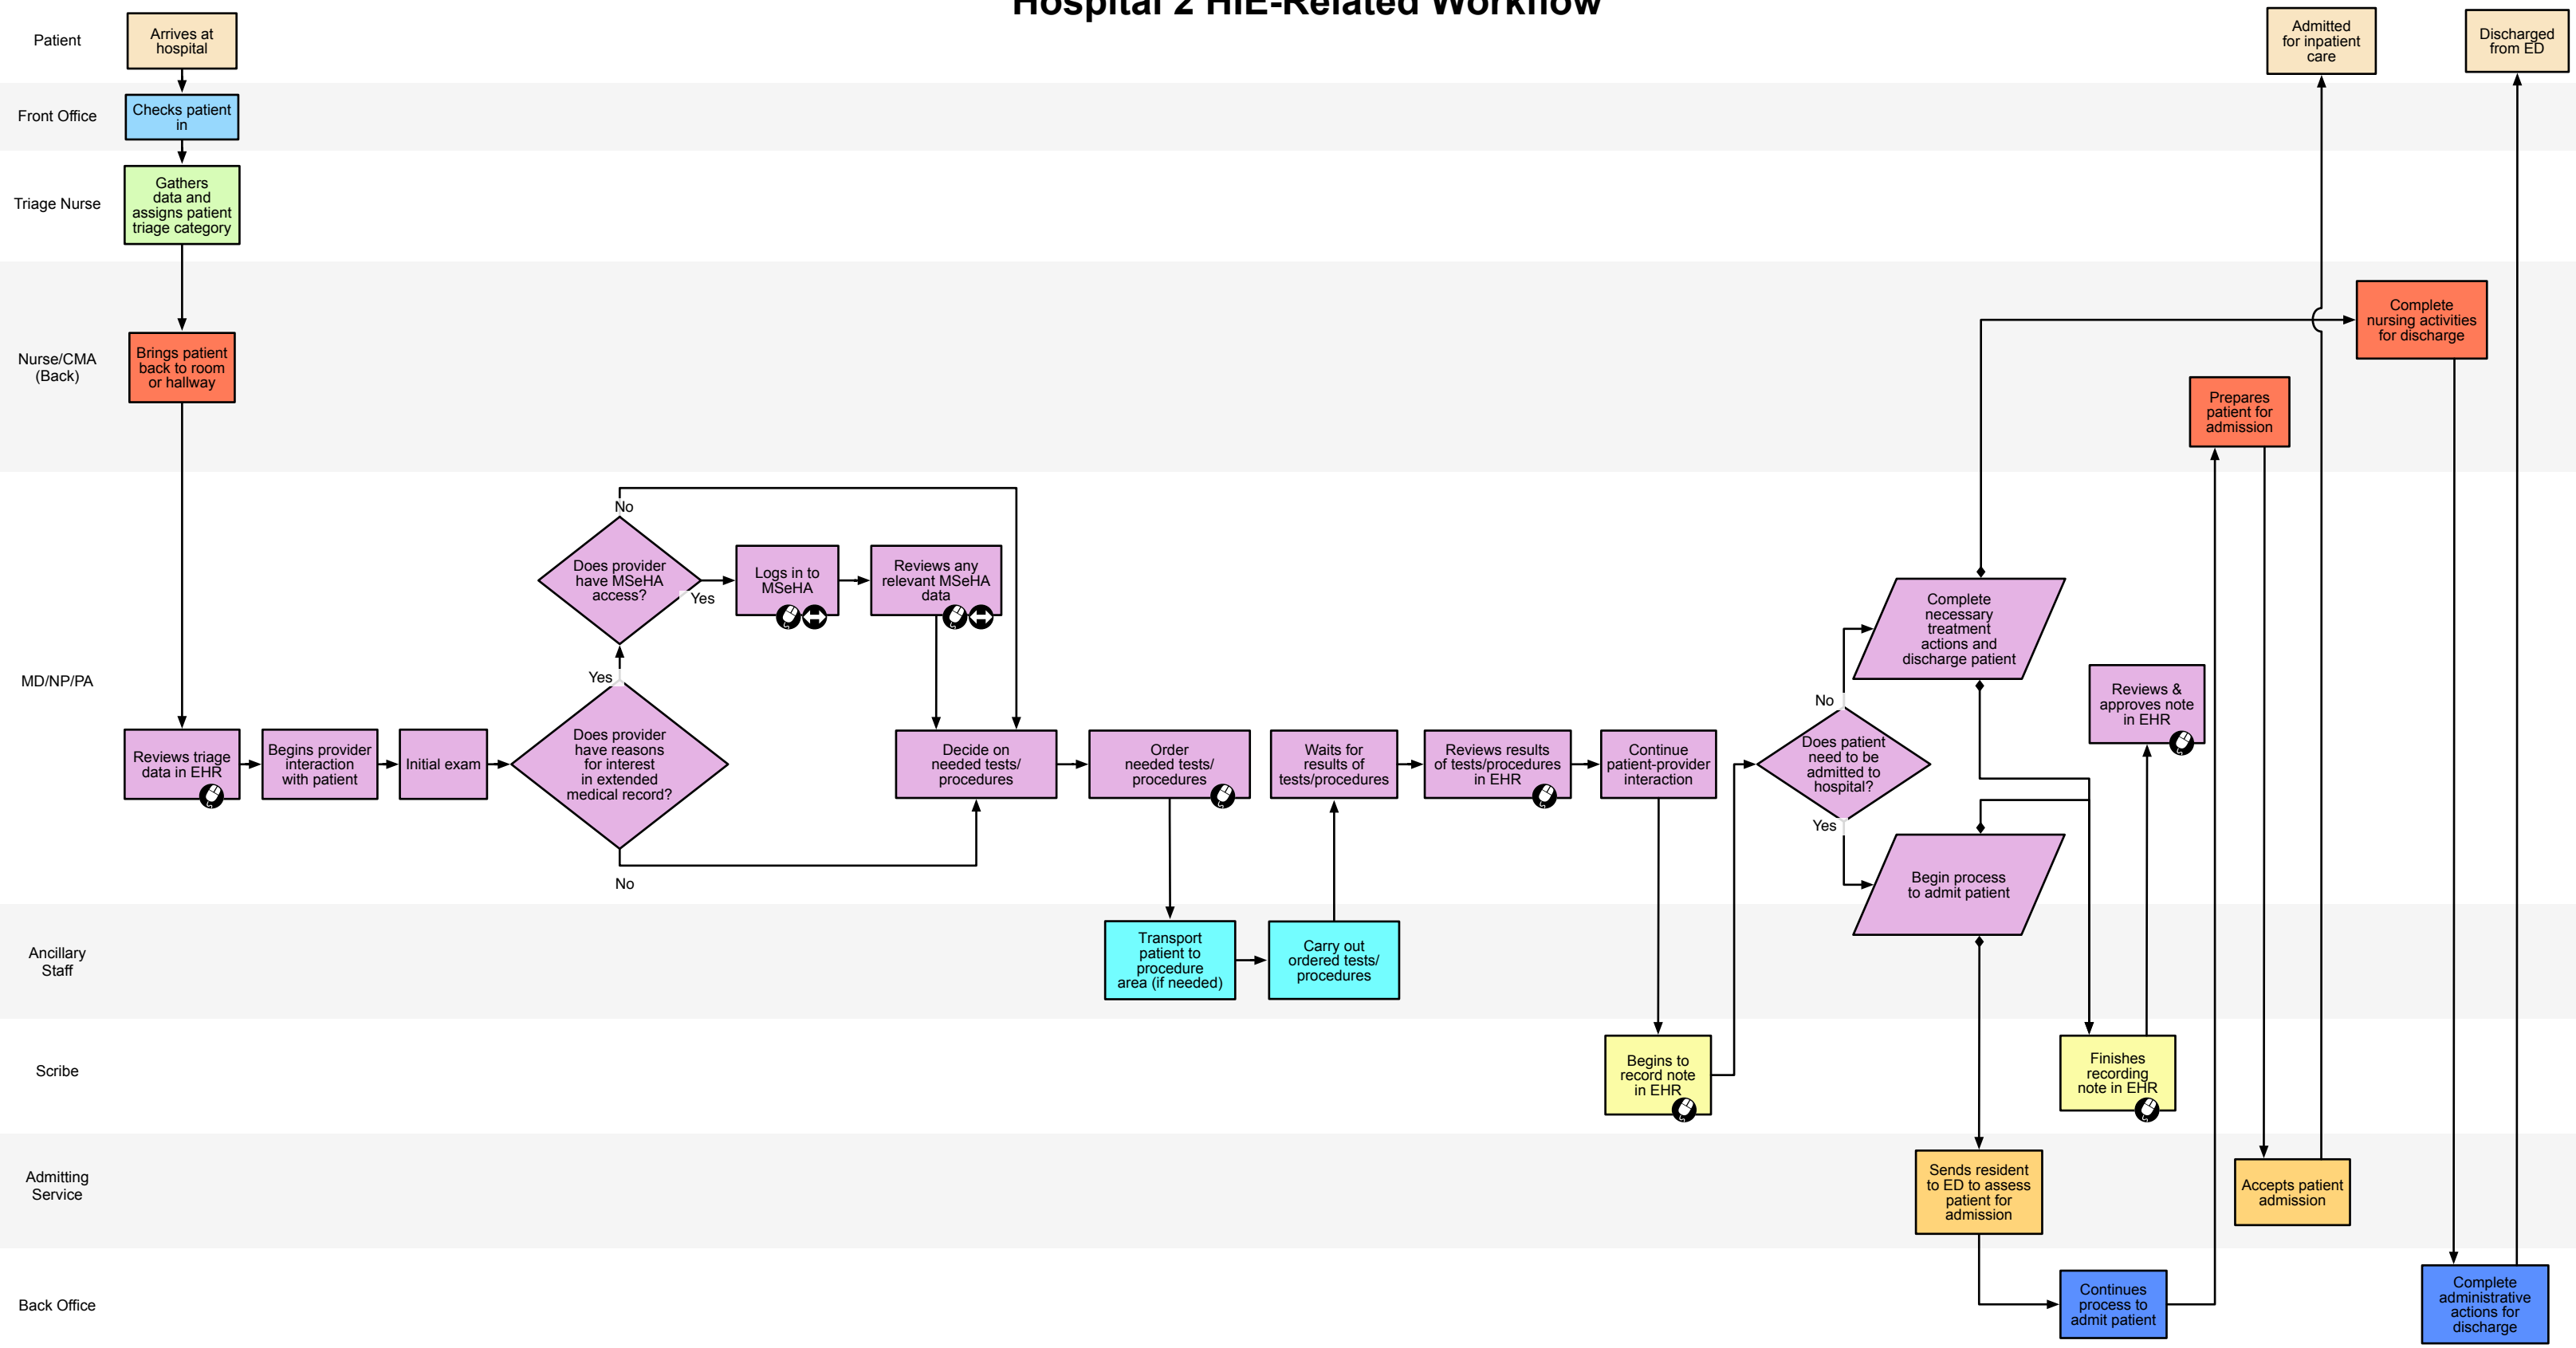

Time

**Legend:**

- Paper or Manual Process
- Computerized or Electronic Process
- Data Exchange Process
- Action
- Decision
- Action, Multiple Simultaneous Outcomes

# Hospital 3 HIE-Related Workflow

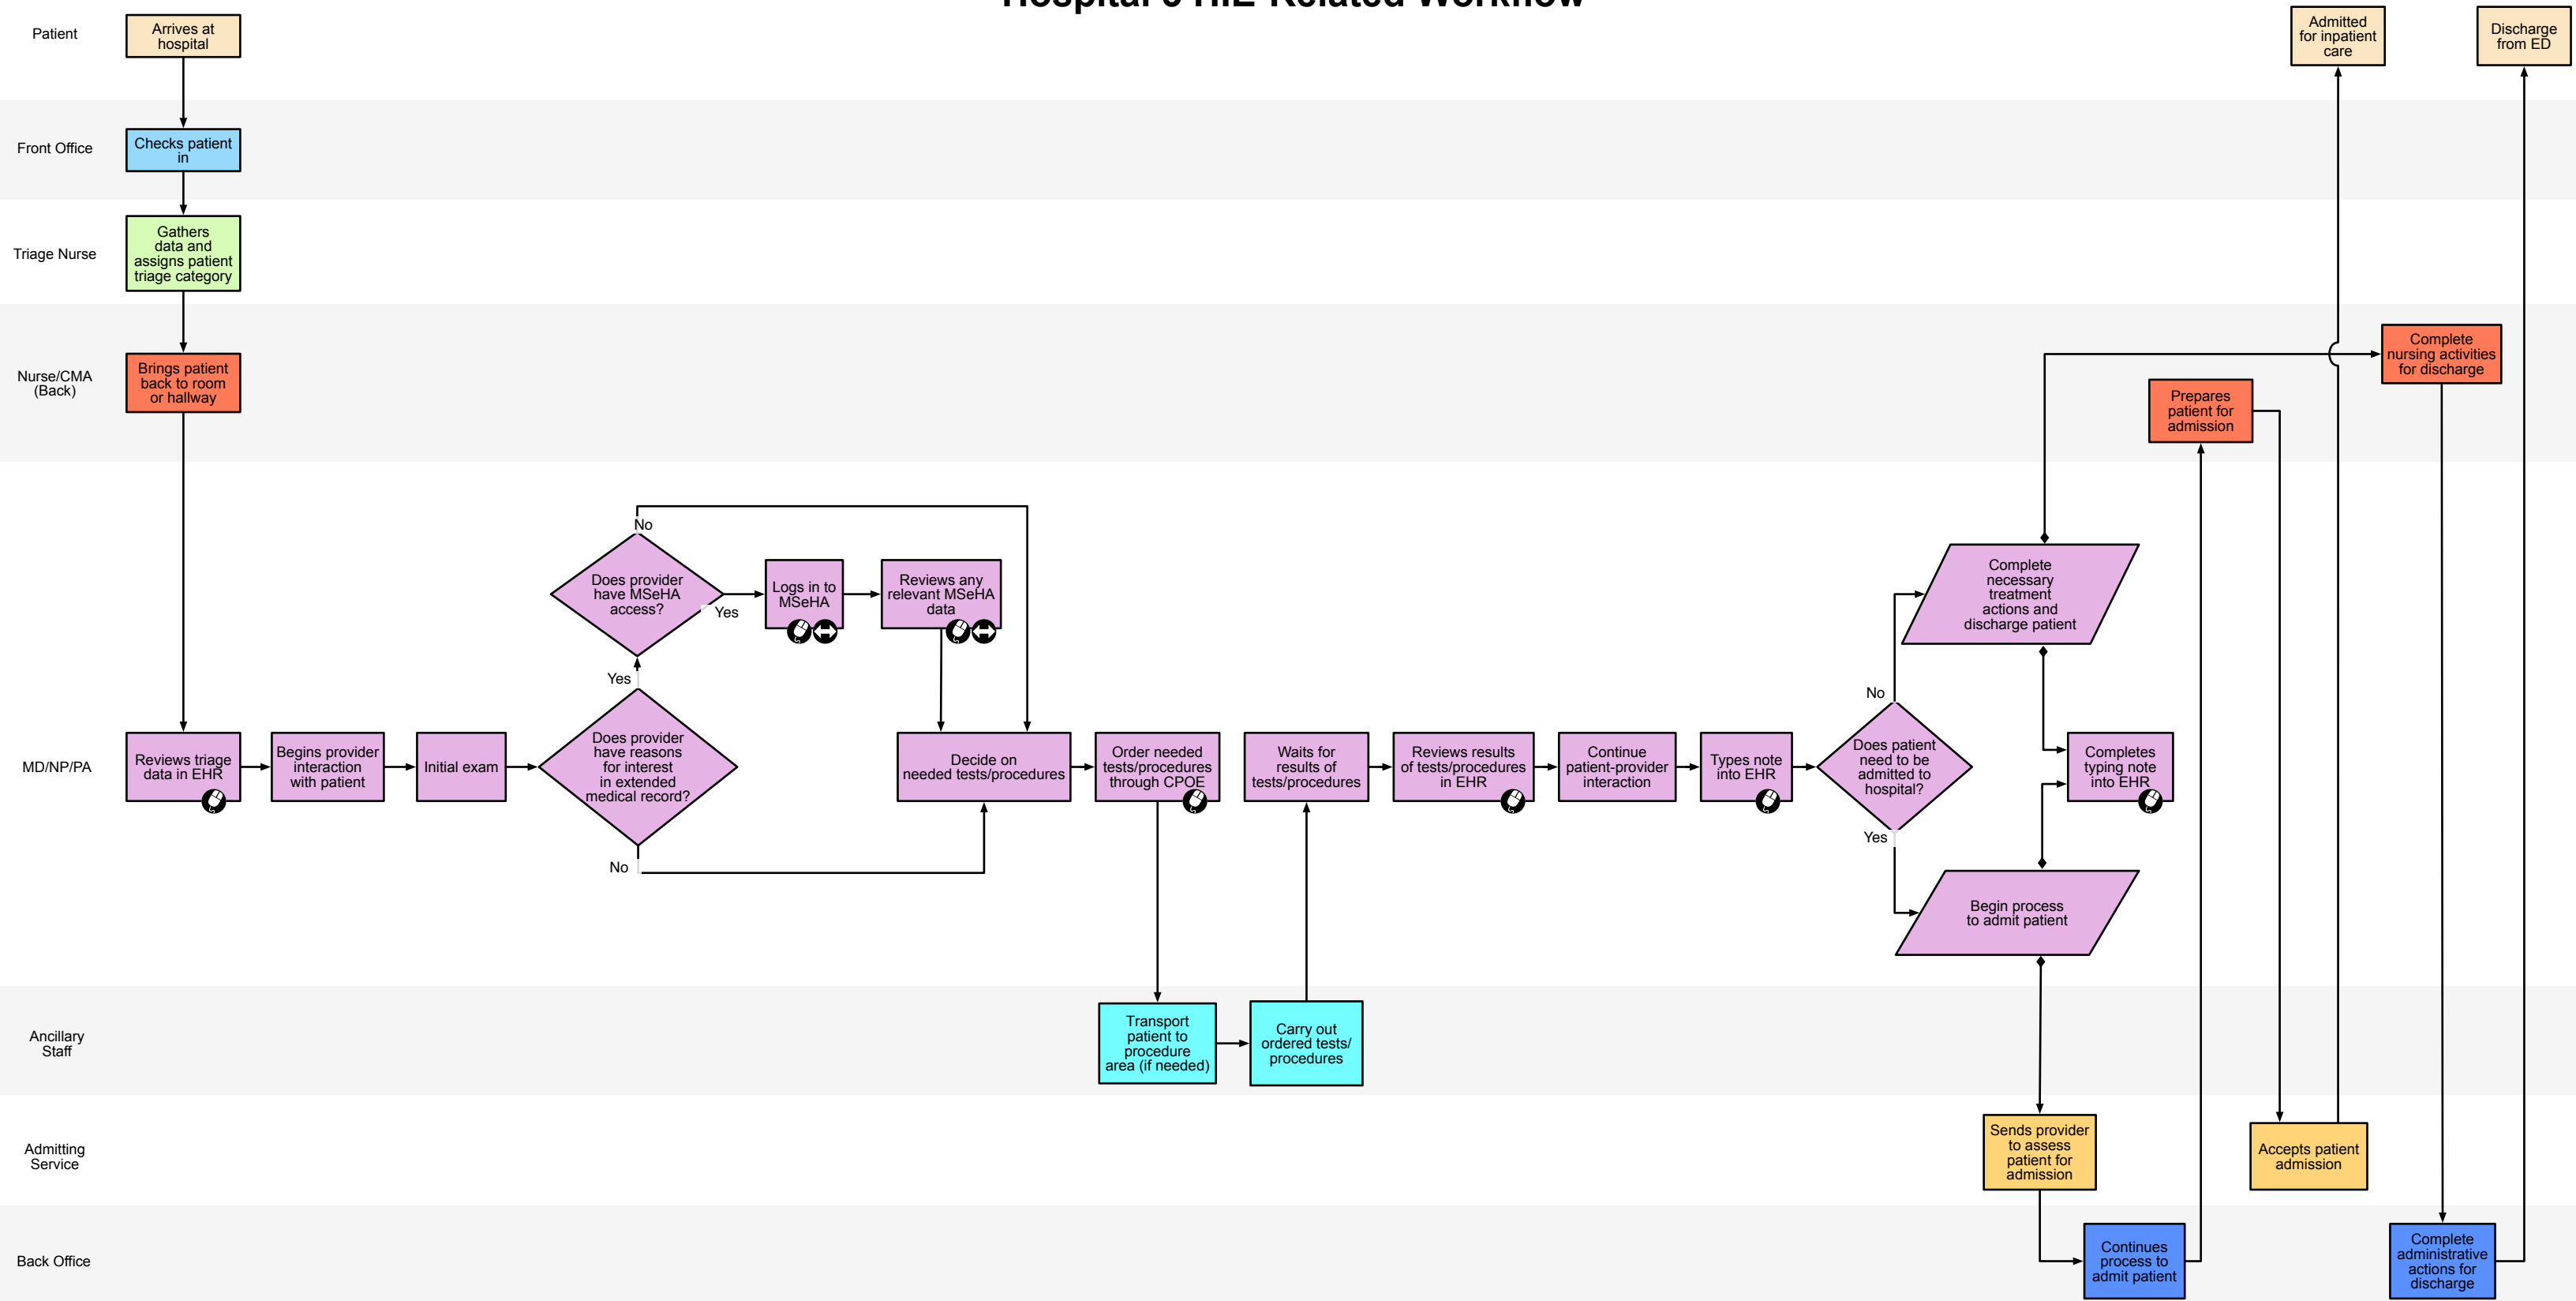

Time

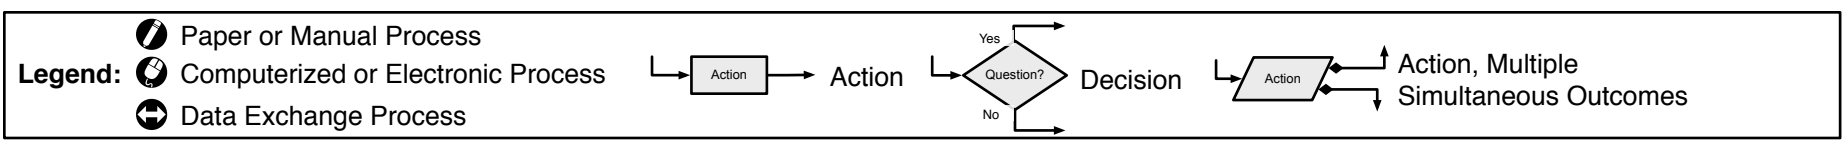

# Hospital 4 HIE-Related Workflow

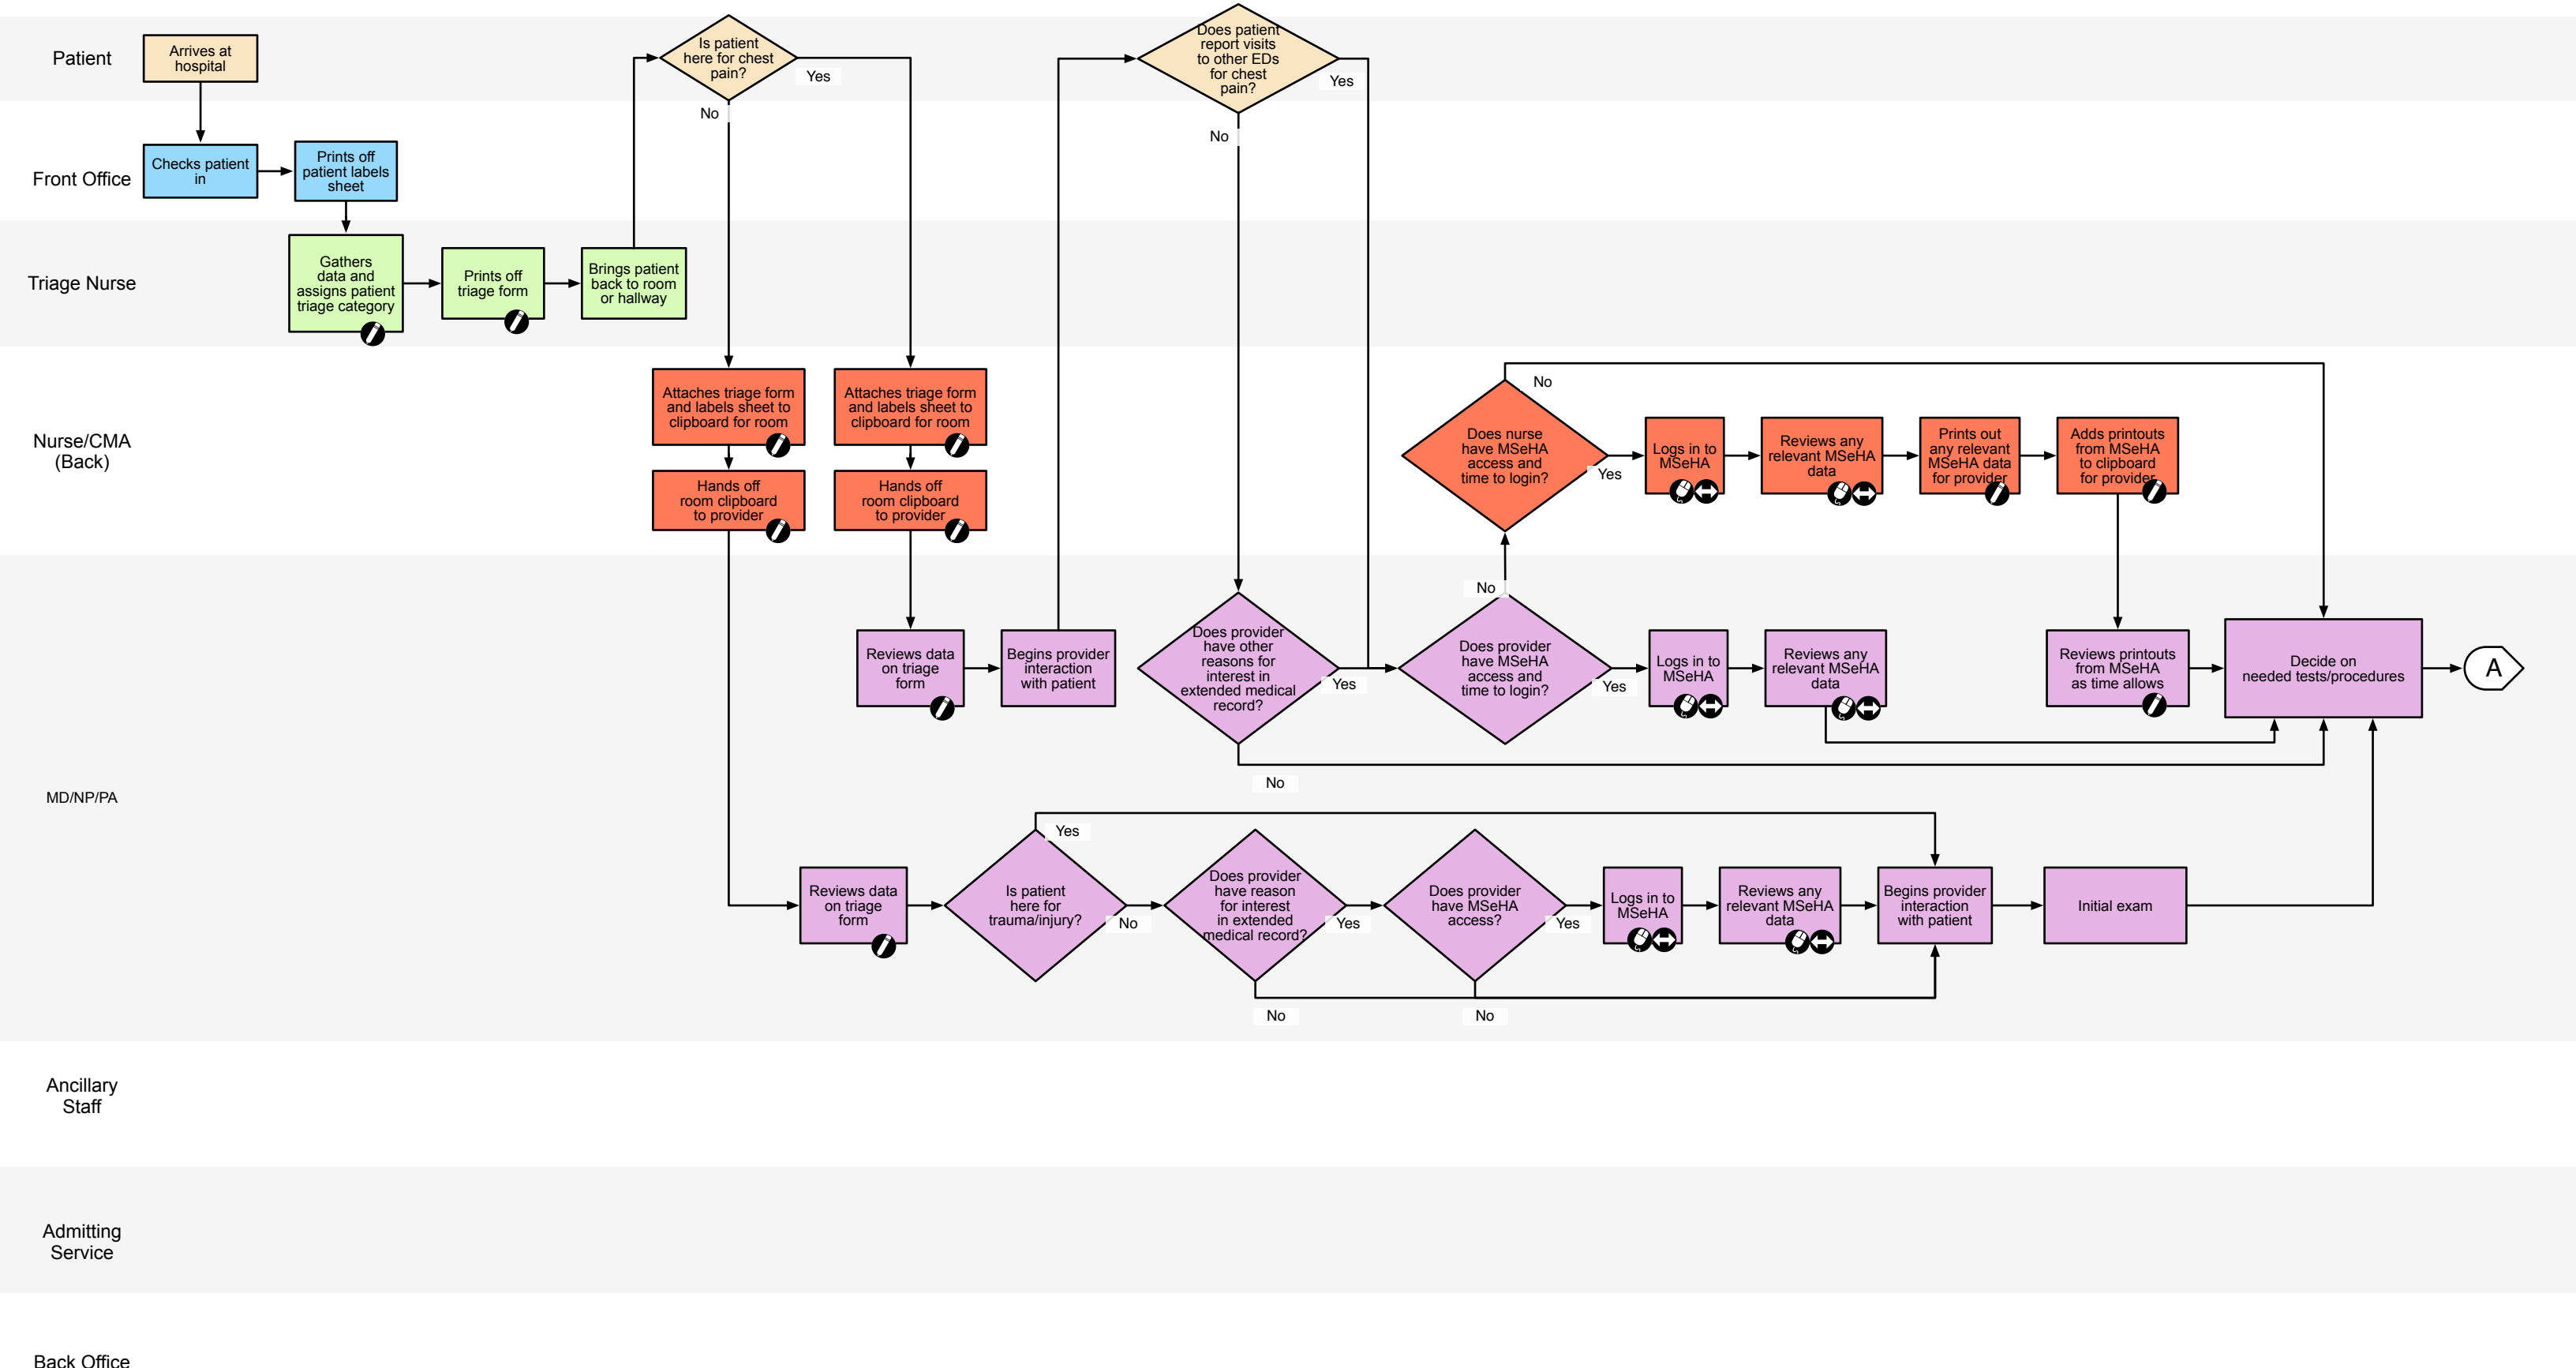

Time →

**Legend:**

- Paper or Manual Process
- Computerized or Electronic Process
- Data Exchange Process
- Action
- Decision
- Action, Multiple Simultaneous Outcomes

# Hospital 4 HIE-Related Workflow (continued)

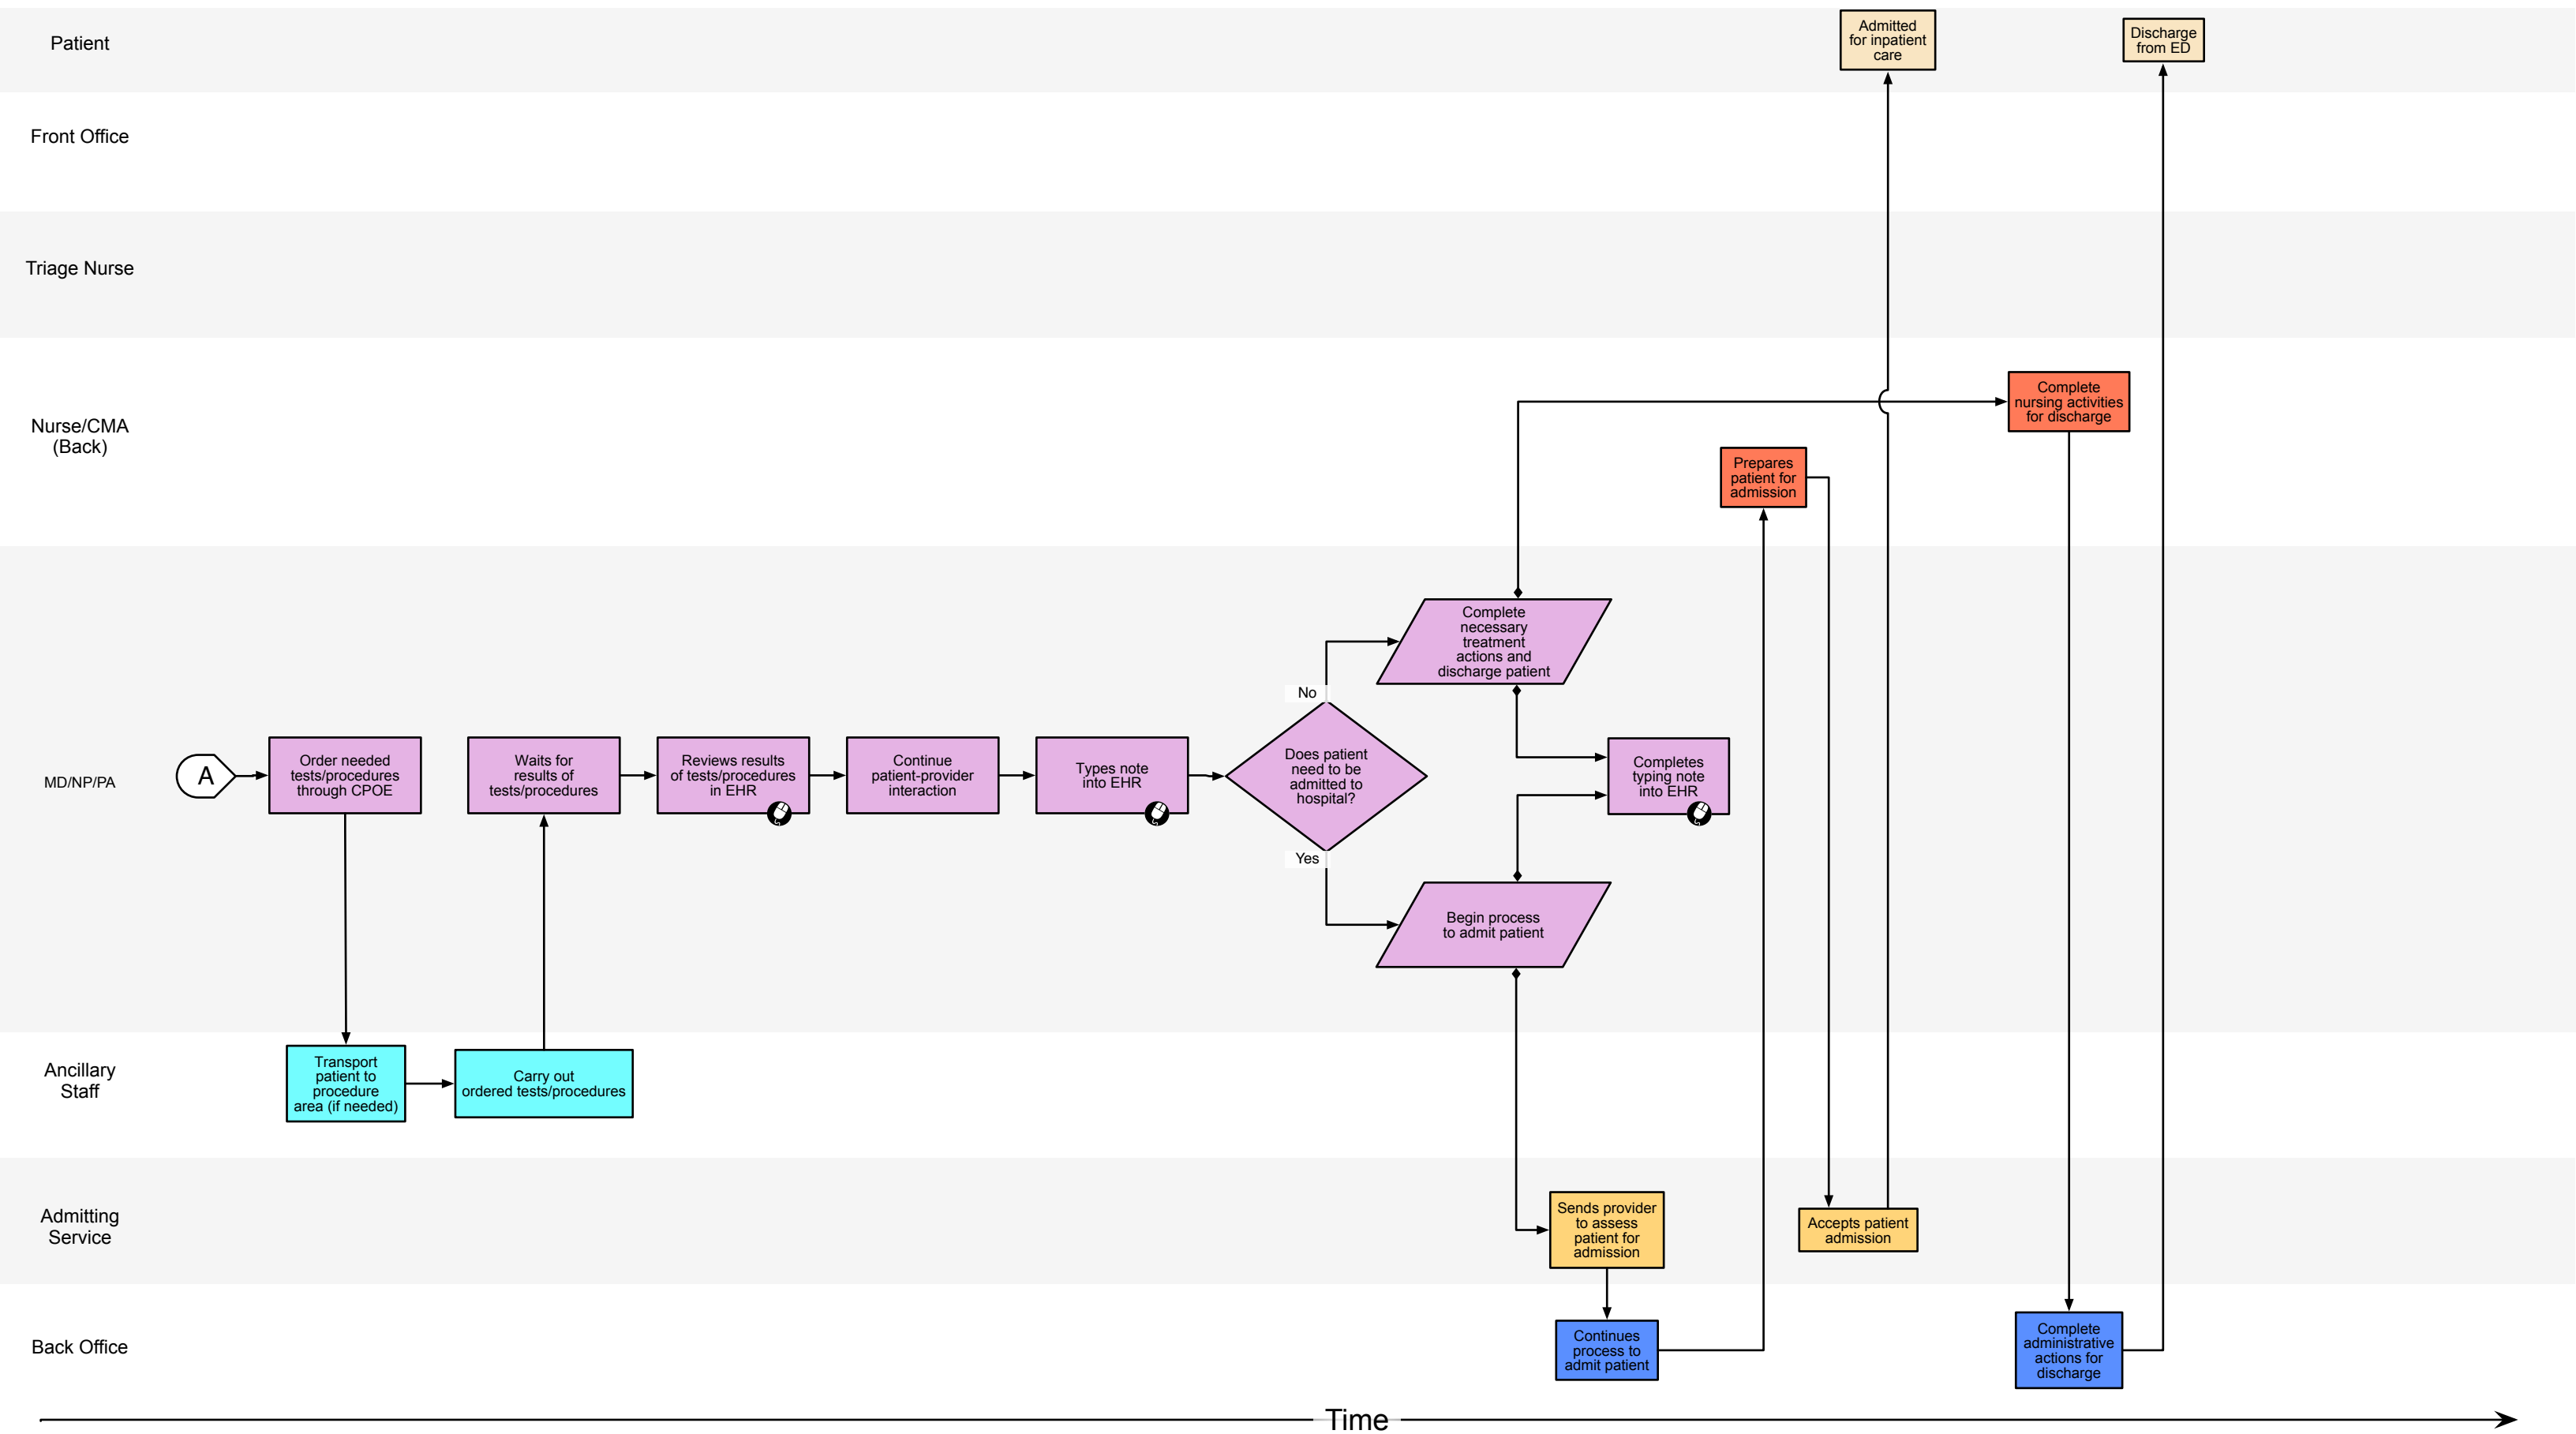

# Hospital 5 HIE-Related Workflow

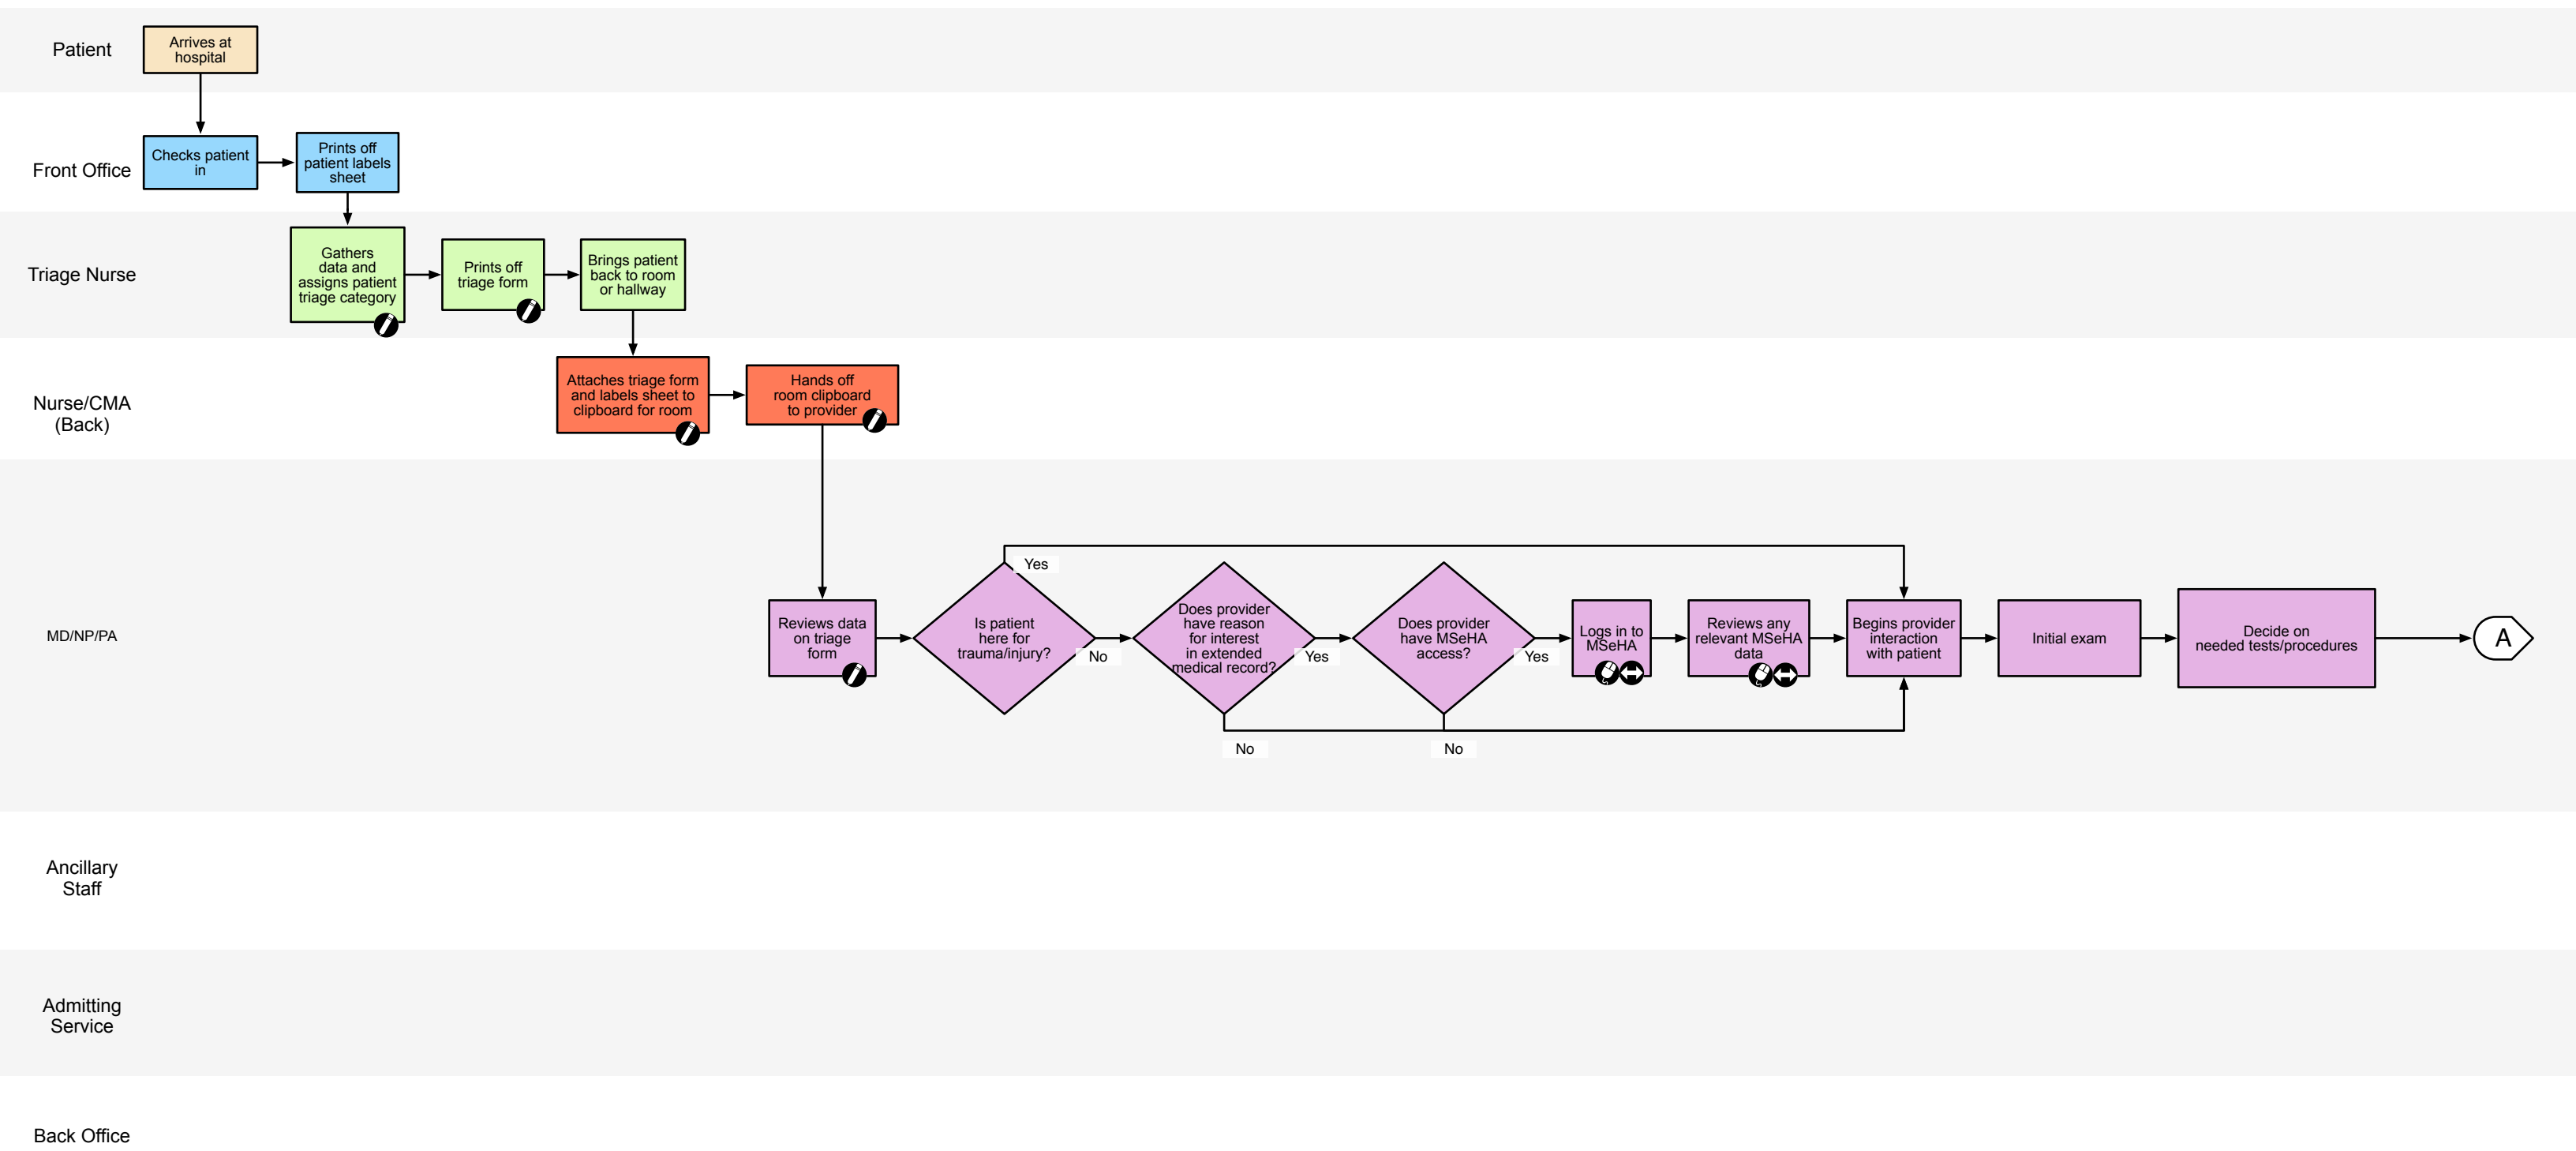

Time

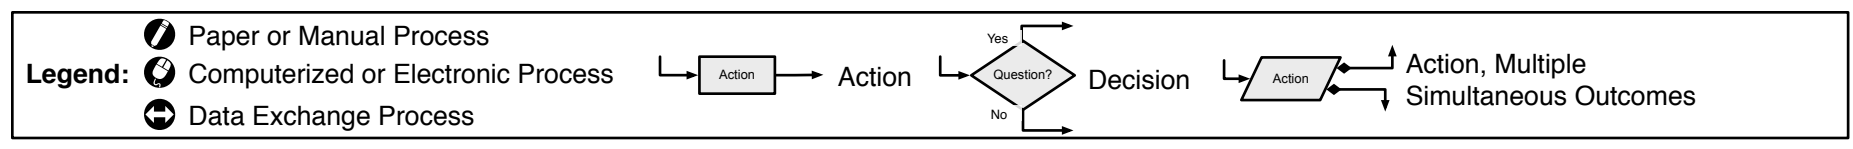

# Hospital 5 HIE-Related Workflow (continued)

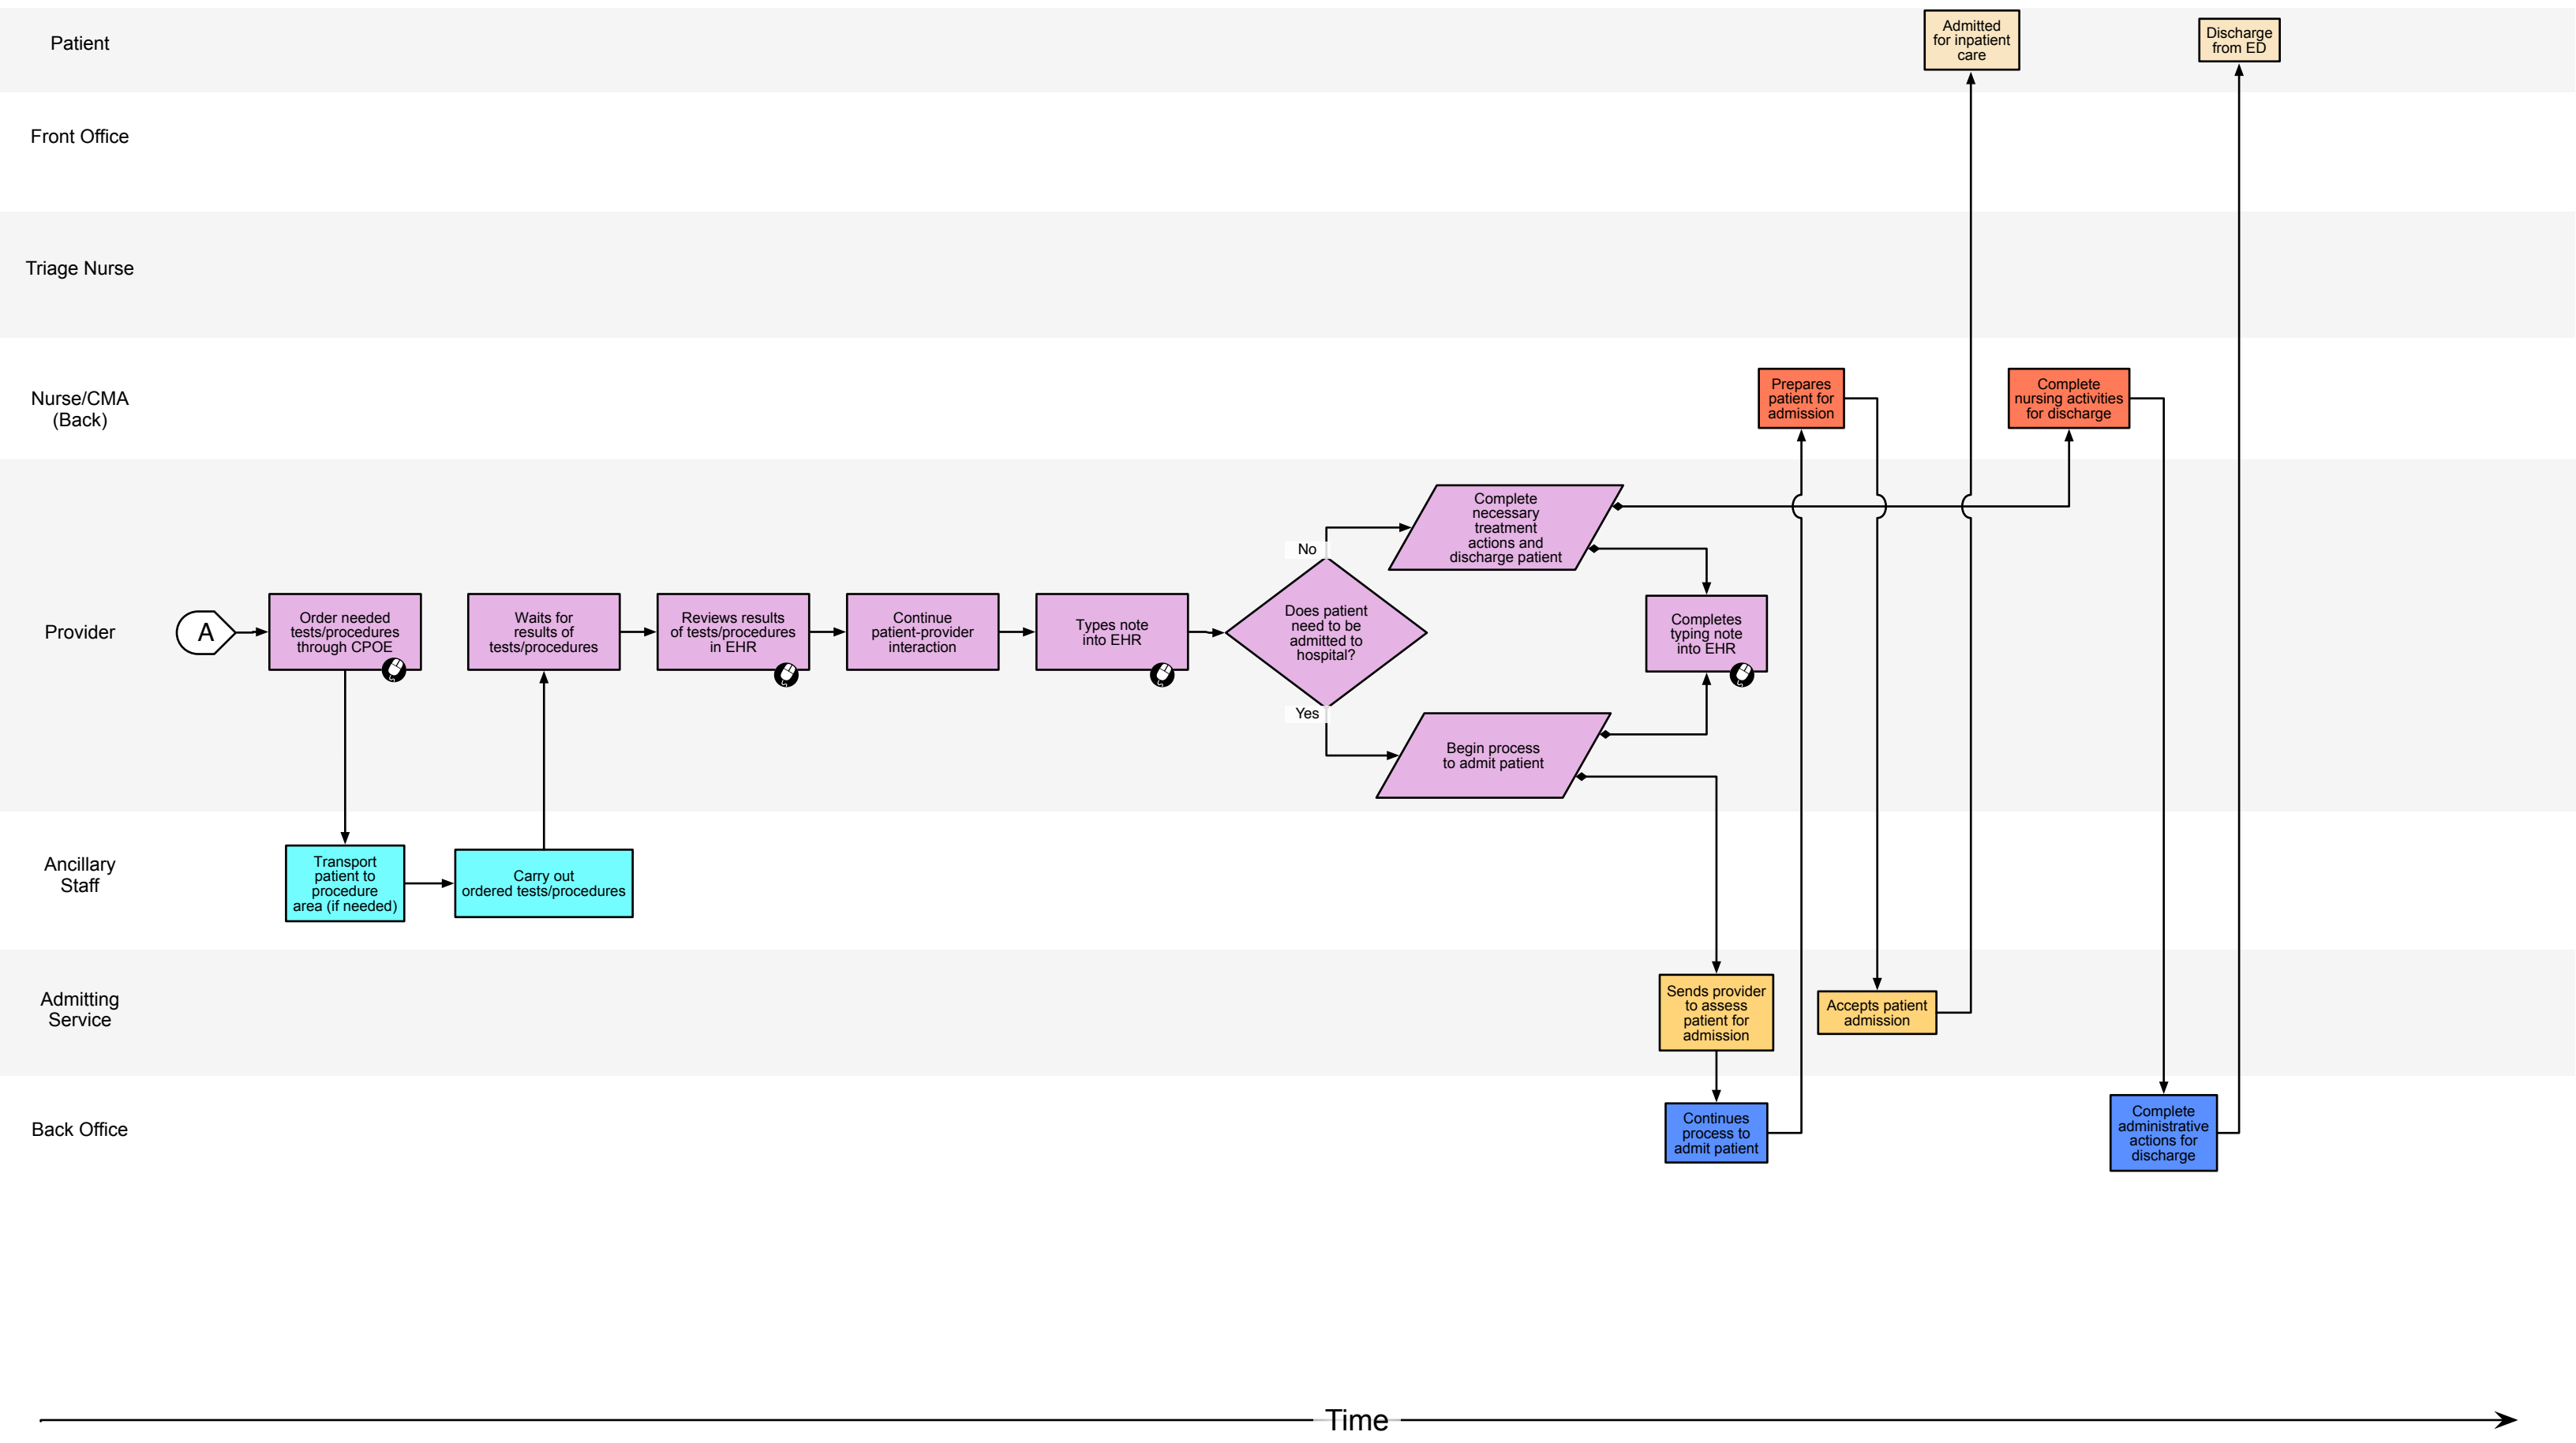

# Hospital 6 HIE-Related Workflow

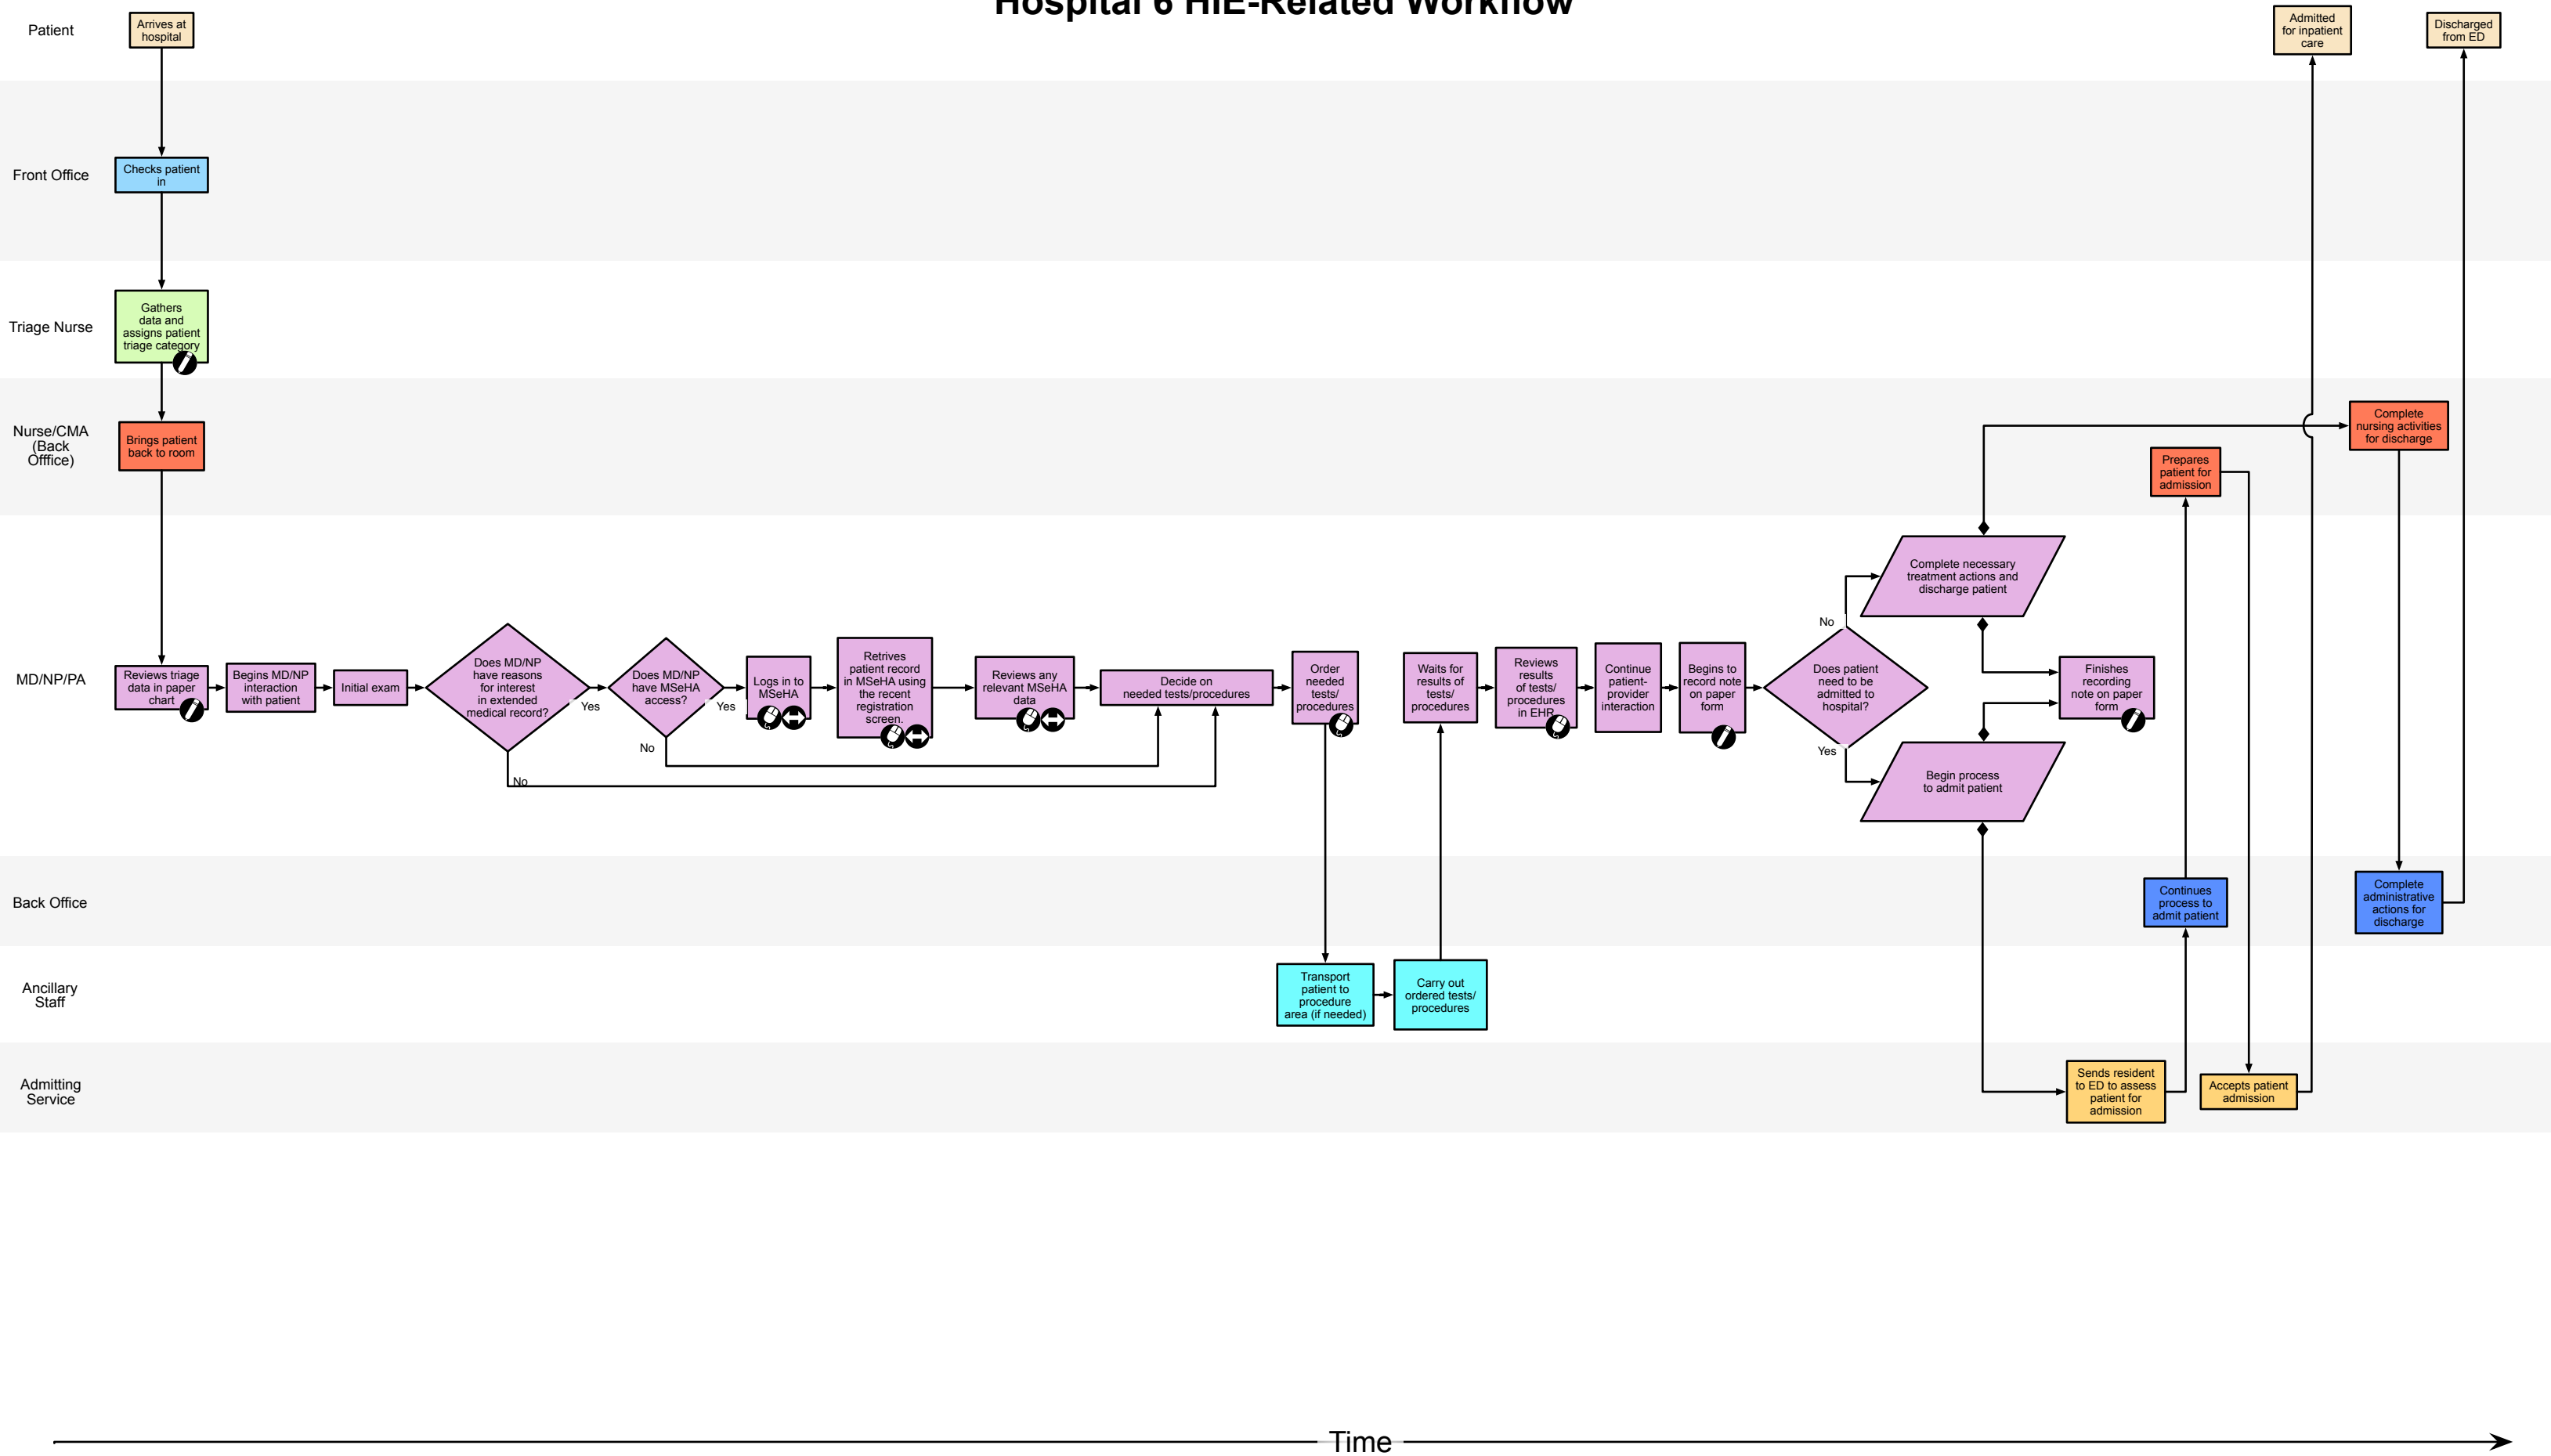

Time →

**Legend:**

- Paper or Manual Process
- Computerized or Electronic Process
- Data Exchange Process

Action → Action
 Decision
 Action, Multiple Simultaneous Outcomes



# Clinic Group A HIE-Related Workflow

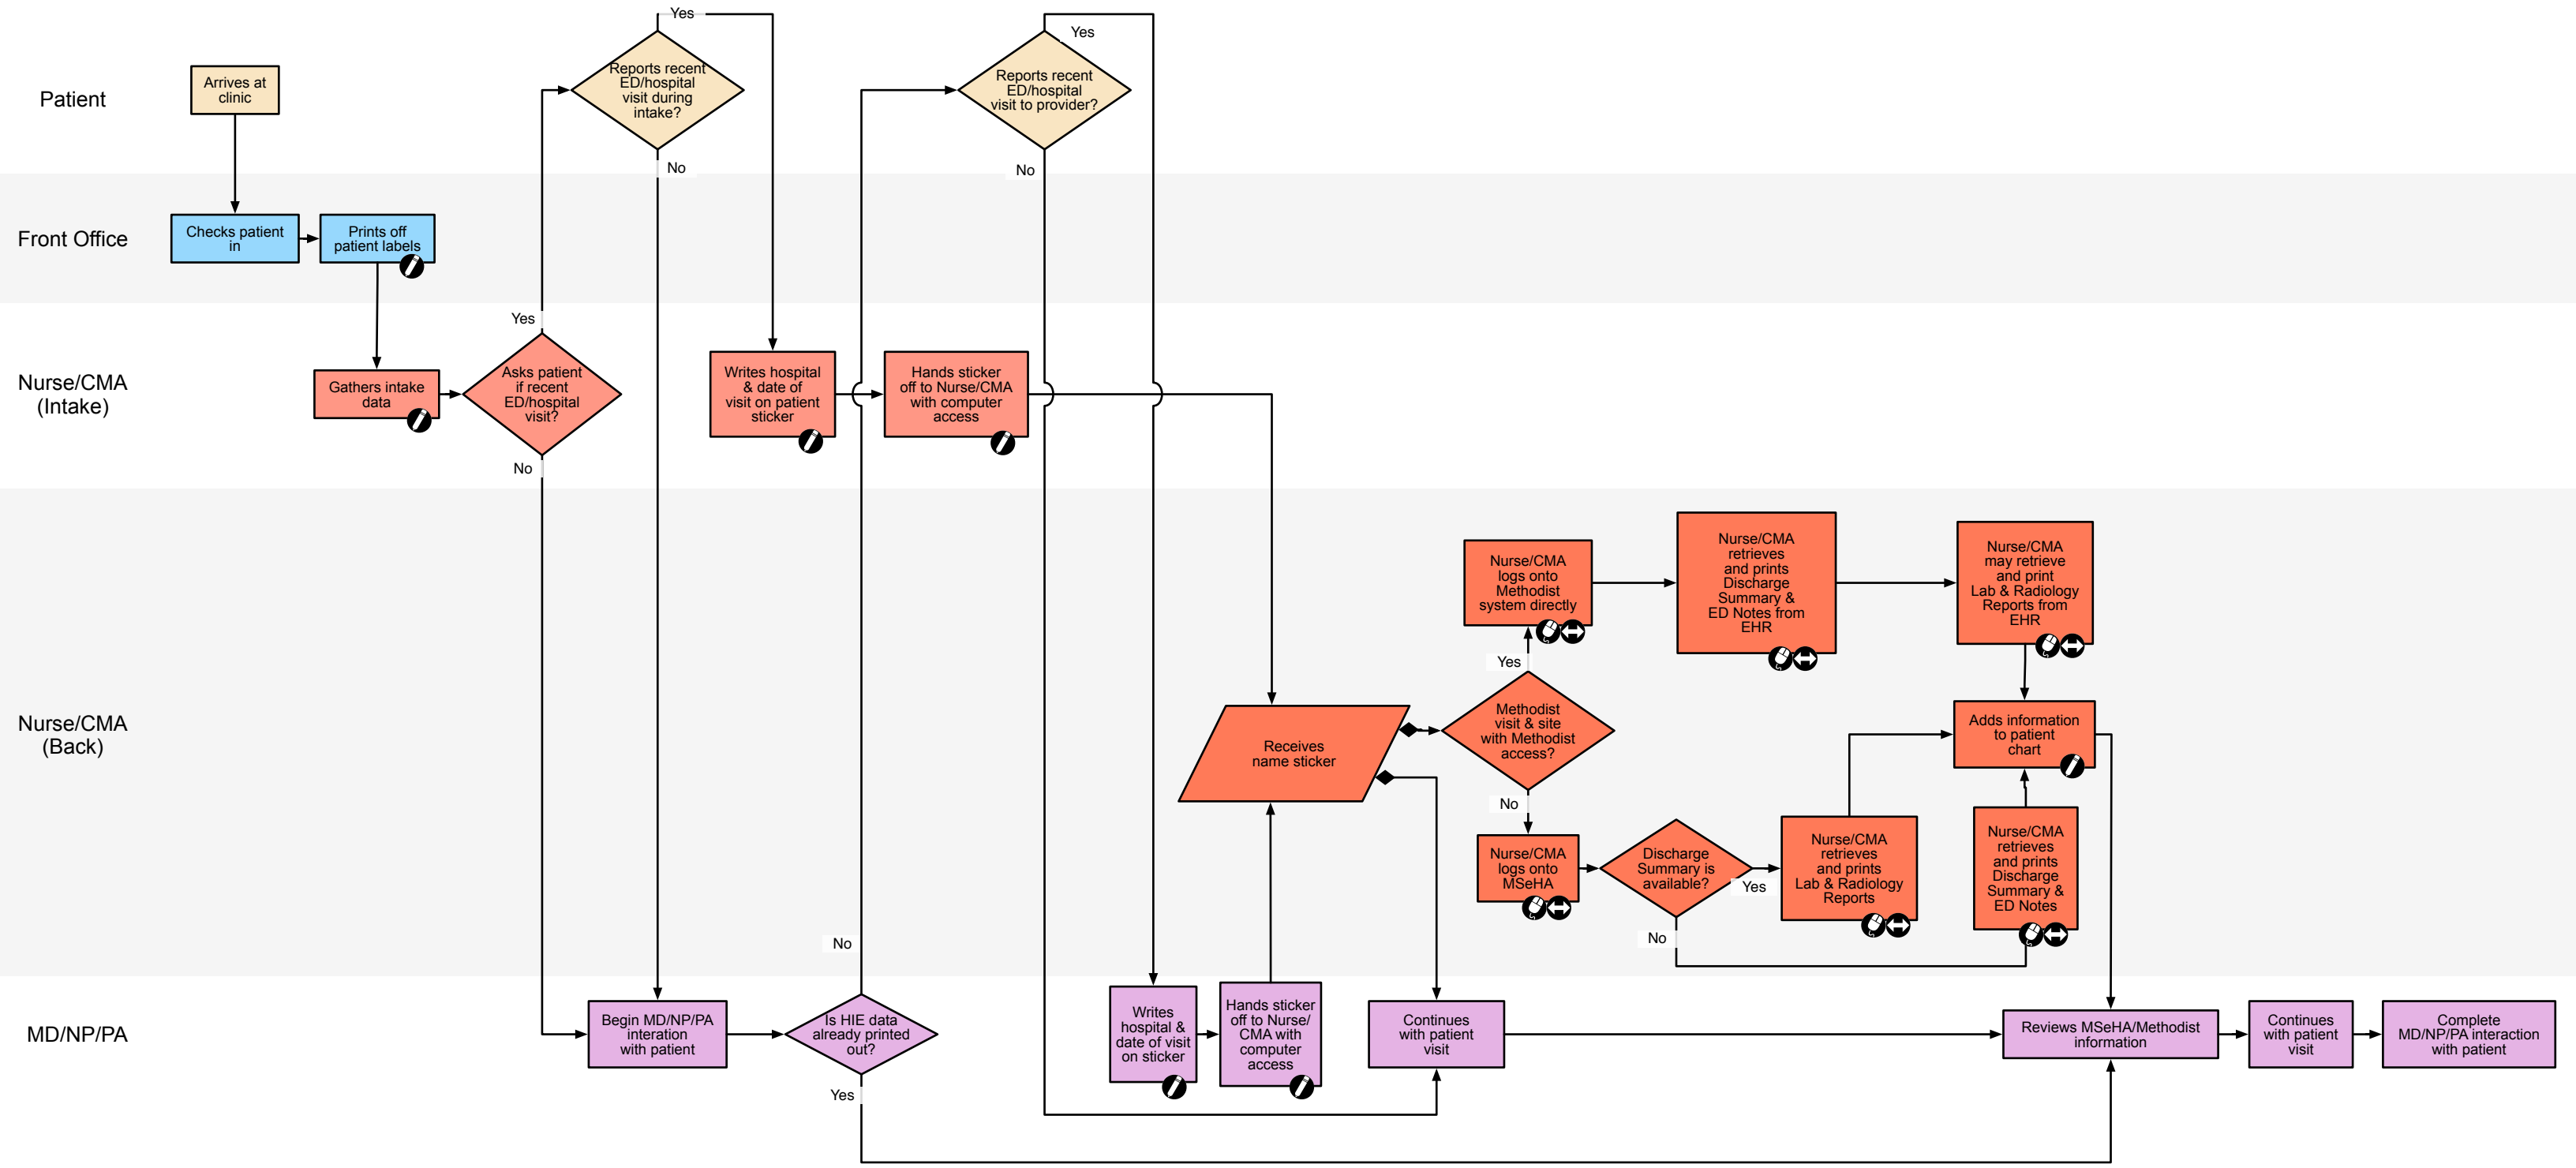

Time →

**Legend:**

- Paper or Manual Process
- Computerized or Electronic Process
- Data Exchange Process

Action → 
 Decision → 
 Action, Multiple Simultaneous Outcomes

# Clinic Group B HIE-Related Workflow

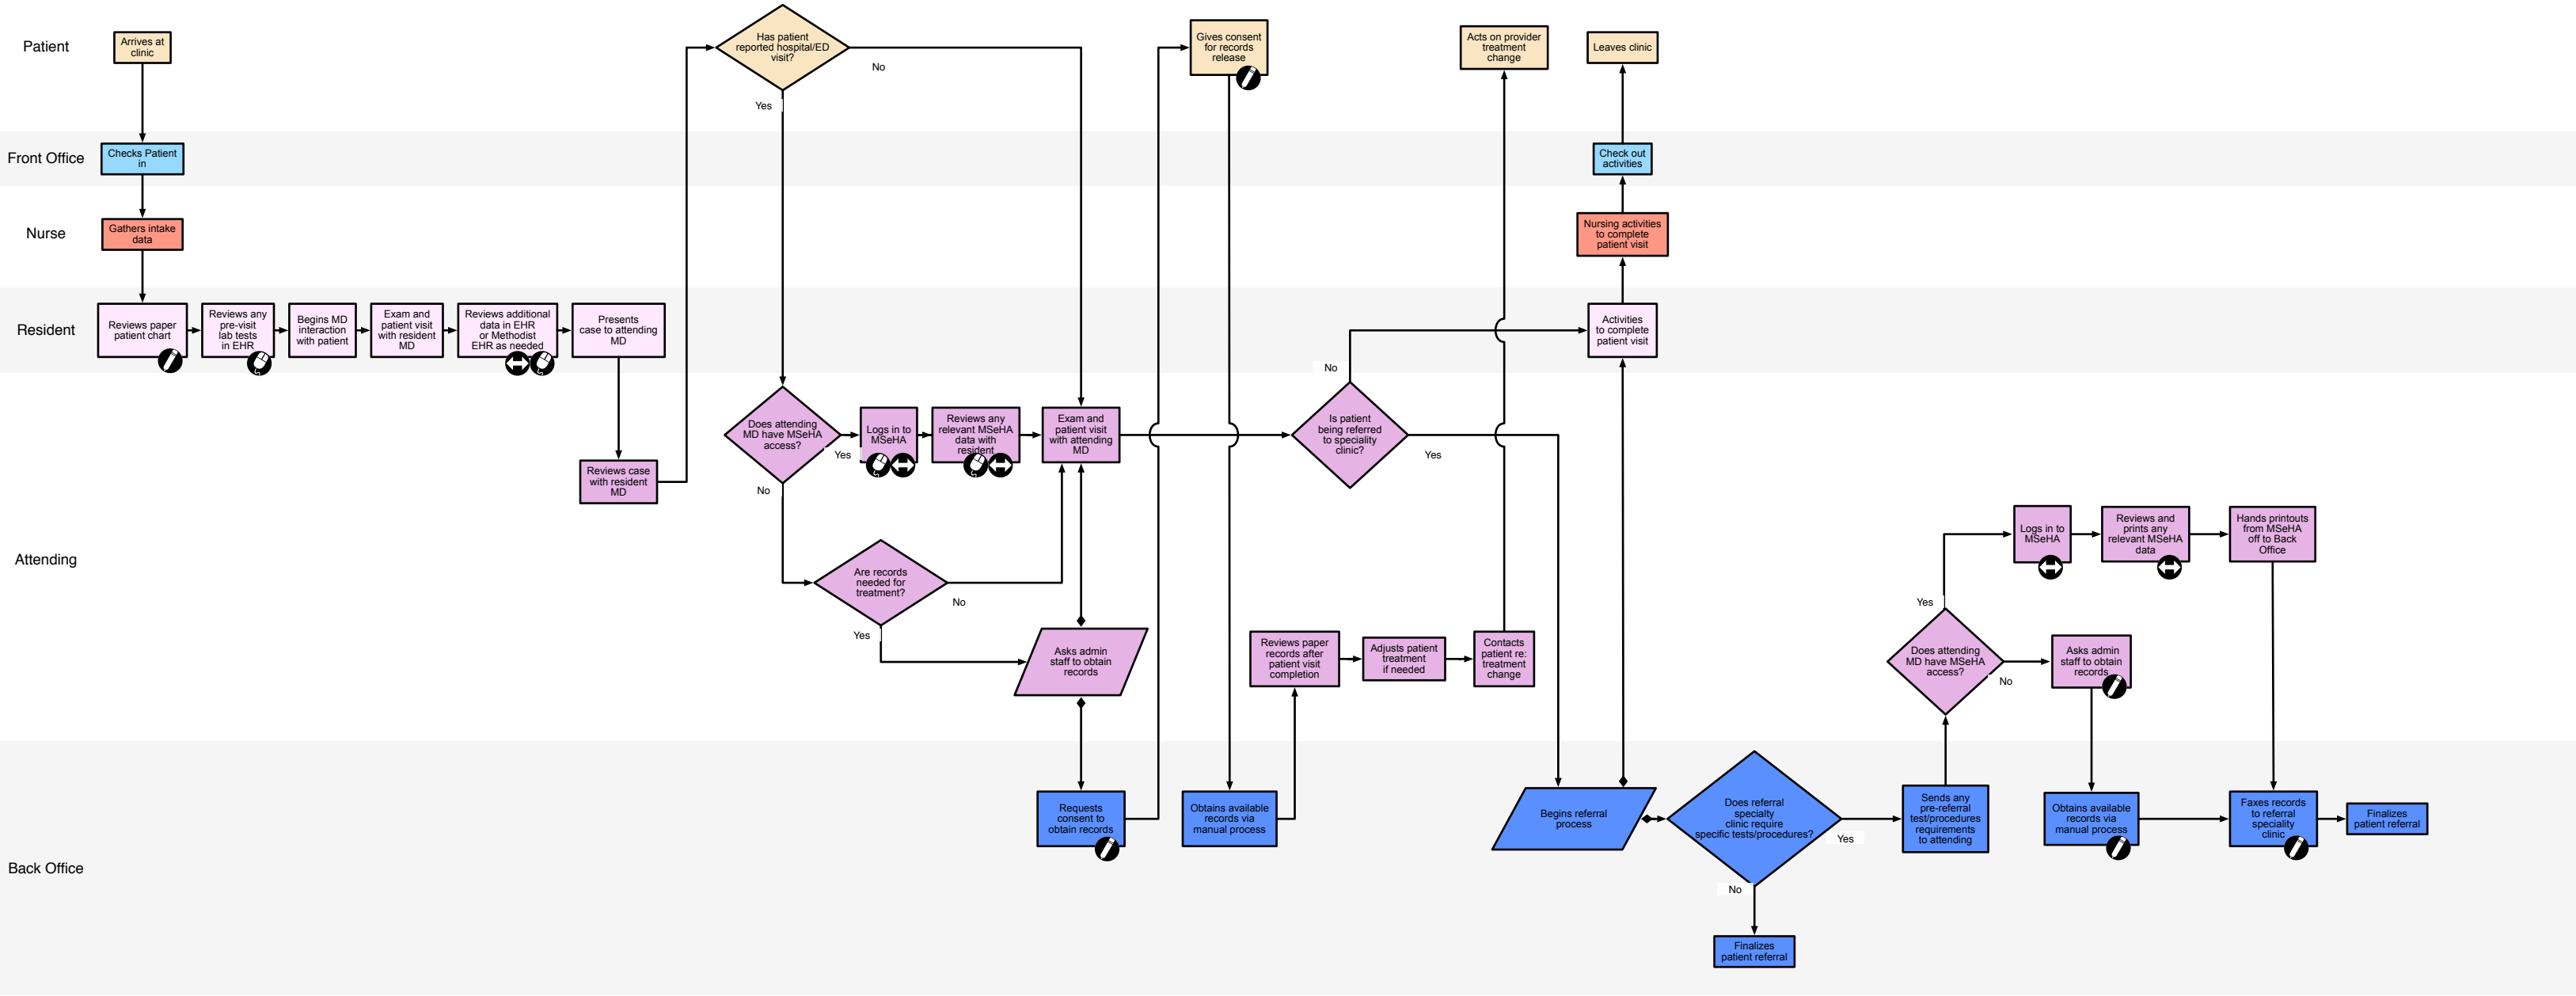

Time →

**Legend:**

- Paper or Manual Process
- Computerized or Electronic Process
- Data Exchange Process
- Action
- Decision
- Action, Multiple Simultaneous Outcomes

# Clinic Group C HIE-related Workflow

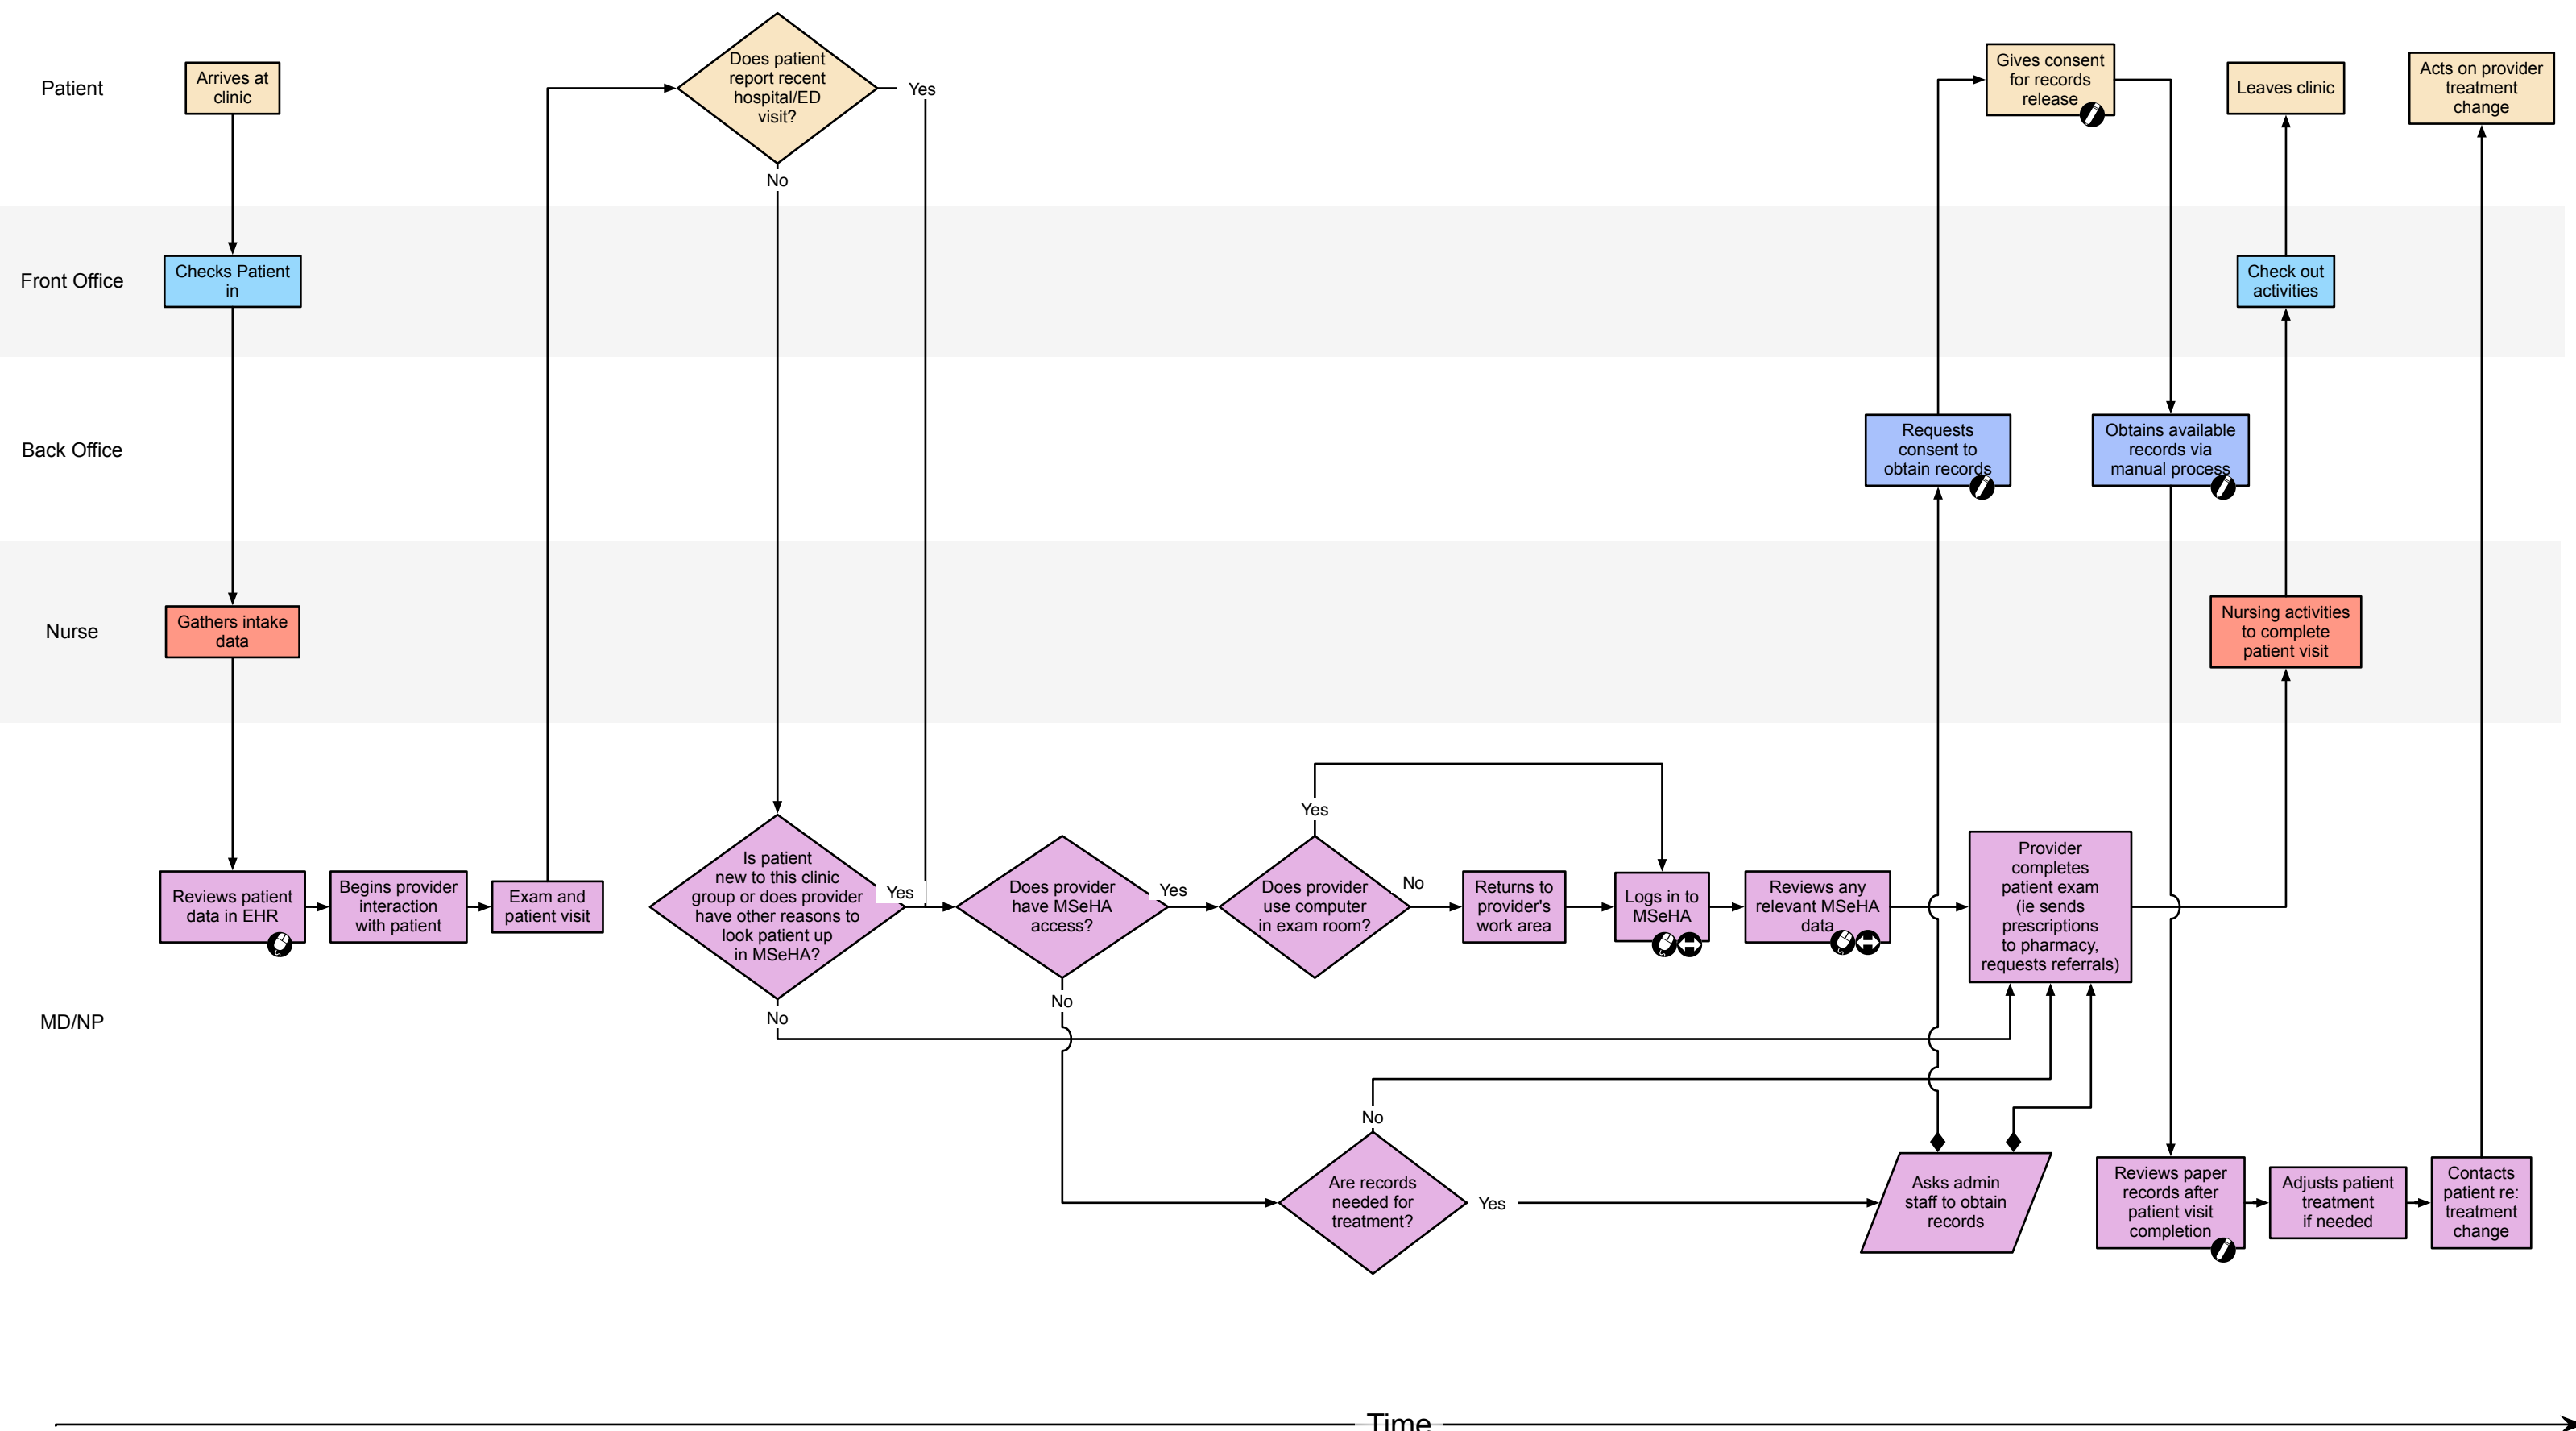

Time →
